# Supplementary material for: Selective monoborylation of methane by metal–organic framework confined mononuclear pyridylimine-iridium(i) hydride
Source: Royal Society of Chemistry journal article supplement (doi:10.1039/d4cc01568a), 2024-01-01
Supplement: d4cc01568a1.pdf [file d4cc01568a1.pdf]

## Supporting Information

### Selective Monoborylation of Methane by Metal-Organic Framework Confined Mononuclear Pyridylimine-Iridium(I) Hydride

Rahul Kalita,<sup>a</sup> Manav Chauhan,<sup>a</sup> Poorvi Gupta,<sup>a</sup> Wahida Begum,<sup>a</sup> Chhaya Thadhani,<sup>a</sup> Biplab Ghosh,<sup>b</sup> Balendra,<sup>a</sup> Himani Bisht,<sup>a</sup> Kuntal Manna\*<sup>a</sup>

<sup>a</sup>Department of Chemistry, Indian Institute of Technology Delhi, Hauz Khas, New Delhi 110016, India

<sup>b</sup>BARC Beamlines Section, Indus-2, RRCAT, Indore 452013, India

\*Email: kmanna@chemistry.iitd.ac.in

### Table of contents

|                                                              |                |
|--------------------------------------------------------------|----------------|
| <b>1. General experiment</b>                                 | <b>S2-S3</b>   |
| <b>2. Synthesis and characterization of pyrim-UiO-68 MOF</b> | <b>S3-S4</b>   |
| <b>3. Post synthetic metalation of pyrim-UiO-68 MOF</b>      | <b>S5-S7</b>   |
| <b>4. Pyrim-UiO-IrH catalysed borylation of methane</b>      | <b>S8-S14</b>  |
| <b>5. GC-MS analysis of the products</b>                     | <b>S15-S19</b> |
| <b>6. DFT calculations</b>                                   | <b>S20-S29</b> |
| <b>7. X-ray absorption spectroscopic analysis</b>            | <b>S30-S33</b> |
| <b>8. XPS analysis</b>                                       | <b>S34-S36</b> |
| <b>9. References</b>                                         | <b>S37-S38</b> |

**1. General experiment.** All the experiments were performed under inert conditions inside the glovebox, except if any case was demonstrated. All the solvents were purchased from Finar and used without further purification. Tetrahydrofuran and cyclohexane were dried with calcium hydride followed by distillation over Na/benzophenone. All the reagents are commercially available and used directly as received. 2,5-Dibromoaniline was purchased from Alfa Aesar,  $\text{IrCl}_3 \cdot 3\text{H}_2\text{O}$  was purchased from TCI chemicals and  $\text{ZrCl}_4$  was purchased from GLR Innovations.  $^1\text{H}$  NMR spectra were recorded on a Bruker NMR 500 DRX spectrometer at 500 MHz and referenced to the proton resonance resulting from  $\text{DMSO-d}_6$  ( $\delta$  2.5) and  $\text{CDCl}_3$  ( $\delta$  7.26). Thermogravimetric analysis (TGA) was performed on a PerkinElmer TGA7 system on well-ground samples under the flowing nitrogen atmosphere with a heating rate of  $10\text{ }^\circ\text{C}/\text{min}$  with a range of  $40\text{-}800\text{ }^\circ\text{C}$ . Room temperature powder X-ray diffraction data were collected on a Bruker Advance diffractometer using Ni-filtered  $\text{Cu K}\alpha$  radiation ( $\lambda = 1.5406\text{ \AA}$ ). Data were collected with a step size of  $0.05^\circ$  and at count time of 1s per step over the range  $4^\circ < 2\theta < 70^\circ$ . The experimental and simulated PXRD patterns are in good agreement indicating the monophasic nature of the bulk samples. For powder X-ray diffraction measurement of MOFs, moist sample was mounted on a PXRD groove. After catalysis, pyrim-UiO-Ir was recovered after centrifugation and stored in THF. Just before the PXRD measurement, the THF was removed, and the moist sample was mounted on a PXRD groove. The catalysis was carried out without any mechanical stirring, and the recovered MOF was not dried before the measurement of PXRD to prevent any mechanical degradation and pore collapse of the MOF. The liquid phase of catalytic reactions was determined by gas chromatograph using Agilent 7890B gas chromatograph equipped with flame ionisation detector (FID) and mass detector (Agilent 5977B GC/MSD). The following chromatographic conditions were employed; carrier gas:  $\text{He}$ ,  $\text{N}_2$ , flow rate:  $1\text{ mL min}^{-1}$ , injection volume:  $5.0\text{ }\mu\text{L}$ , column oven temperature was initially  $40.0\text{ }^\circ\text{C}$  and then increased up to  $240\text{ }^\circ\text{C}$  with the rate of  $5\text{ }^\circ\text{C}$  per minute, and detector temperature was  $250\text{ }^\circ\text{C}$ . ICP-OES data were obtained with an Agilent 5110 ICP-OES and analyzed using Dichroic Spectral Combiner (DSC). Samples were diluted in a  $5\%$   $\text{HNO}_3$  matrix and analyzed with a four-point standard curve over the range from 1 ppm to 10 ppm. The correlation coefficient was  $>0.9990$  for all analytes of interest. All the borylation reactions were performed using 100 mL Parr pressure vessels [4793 (VGR)-T-SS-3000-DVD]. The vessel was pressurized directly from a  $\text{CH}_4$  gas tank using a gauge (0-3000 psi displayed, 0-200 bar). To analyse the chemical state of transition elements, XPS were recorded on an X-ray photoelectron spectrometer, PHI 5000 VersaProbe III using  $\text{Al-K}\alpha$  ( $h\nu = 1486.6\text{ eV}$ ) X-ray source. MOF samples were vacuum dried at room temperature, and then powder samples were

measured ultra-high vacuum environment. Surface area and pore volume were measured with a BELLSORP MAX II-high performance gas and vapor adsorption system with three microporous ports. For BET surface area measurement, MOF sample was first dried via freeze-drying method. For freeze-drying, MOF was first soaked with benzene. Then, the MOF slurry was frozen at -10 °C and dried slowly under vacuum at the same temperature. Then, samples were degassed under vacuum at 80 °C for 24 h before measurement. The morphology and chemical compositions were analysed with a Zeiss Fe-SEM ultra plus55 operating at 20 KV. After vacuum drying, a very small amount of the powder samples of MOF (1-2 mg) were dispersed on the carbon tape for FE-SEM imaging. Infra-red (IR) spectra of samples were recorded with FT-IR Spectrometer (MS-632). The MOF samples were vacuum dried at 100 °C to remove the moisture, which was then taken inside the glovebox, and a KBr pellet of powder sample was made. The pellets were kept in inert conditions and IR was recorded under a nitrogen atmosphere.

## 2. Synthesis and characterization of pyridylimine-functionalized UiO-68 MOFs.

### 2.1. Synthesis of UiO-68-NH<sub>2</sub> MOF.<sup>1</sup>

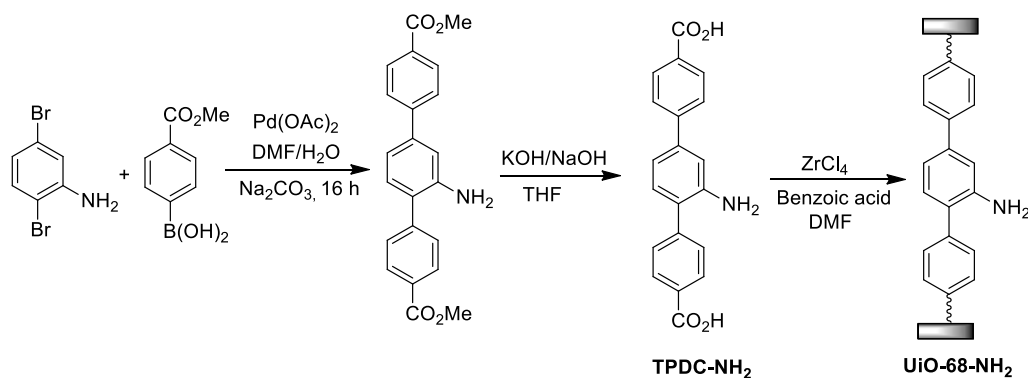

In a 10 mL glass vial, TPDC-NH<sub>2</sub> (2'-amino-[1,1':4',1''-terphenyl]-4,4''-dicarboxylic acid) ligand (0.010 g, 0.03 mmol), which was synthesized with the help modified procedure<sup>2,3</sup>, and benzoic acid (0.073 g, 0.6 mmol) were dissolved in a DMF solution (1.22 mL) followed by the addition of ZrCl<sub>4</sub> (0.007 g, 0.03 mmol). The resulting mixture was sonicated for few minutes and then kept it in a preheated oven at 70 °C for 3 d. After cooling to room temperature, the crystalline solid was isolated by centrifugation and washed it by DMF several times to afford UiO-68-NH<sub>2</sub> MOFs in 41% yield.

## 2.2. Synthesis of pyrim-UiO MOFs via post-synthetic modification of UiO-68-NH<sub>2</sub> MOFs.<sup>4</sup>

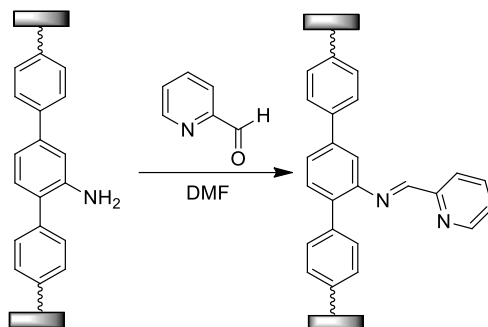

In a centrifuge tube inside the glovebox, UiO-68-NH<sub>2</sub> MOF (0.017 g, 0.006 mmol) was added in 1 mL DMF followed by the addition of 2-pyridinecarboxaldehyde (4  $\mu$ L, 0.04 mmol). It was then left overnight with periodic shaking. The resultant solid was washed multiple times with DMF to obtain pyrim-UiO-68 MOF as a light brown solid.

**2.2.1. Analysis of digested pyrim-UiO MOFs by <sup>1</sup>H NMR.** Sample of pyrim-UiO MOF was charged in a vial containing 0.5 mL of DMSO-*d*<sub>6</sub>, and then 0.5 mL saturated solution of K<sub>3</sub>PO<sub>4</sub> in D<sub>2</sub>O was added to it and mixed well. The top organic layer was taken and analyzed by <sup>1</sup>H NMR.

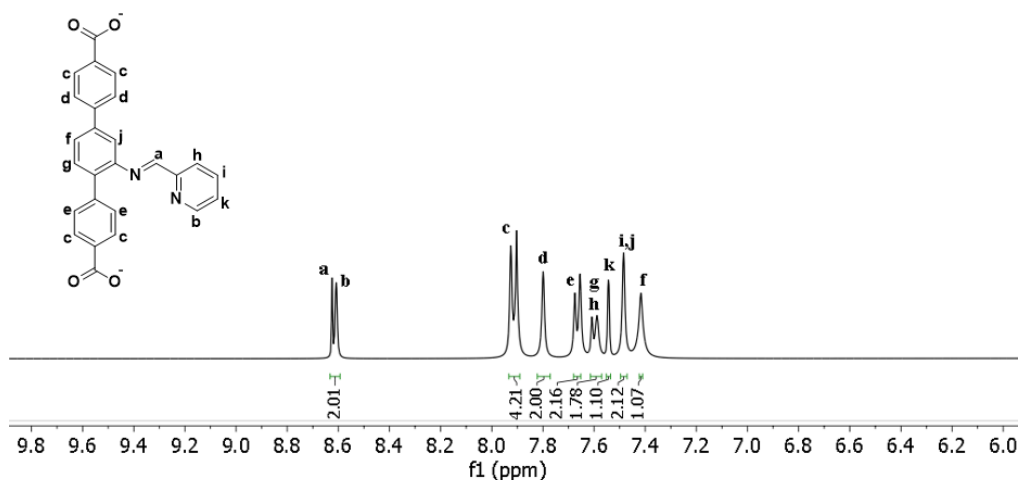

**Figure S1.** <sup>1</sup>H NMR spectrum (500 MHz, DMSO-*d*<sub>6</sub>) of pyrim-UiO MOF digested in K<sub>3</sub>PO<sub>4</sub>/D<sub>2</sub>O/DMSO-*d*<sub>6</sub>.

### 3. Post synthetic metalation of pyrim-MOF.<sup>5</sup>

#### 3.1. Synthesis of pyrim-UiO-IrCl<sub>3</sub>.

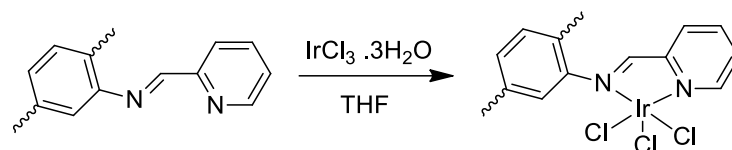

Pyrim-UiO MOF (0.030 g, 0.009 mmol) in THF was charged into a vial to which a 1 mL THF solution of IrCl<sub>3</sub>.3H<sub>2</sub>O (0.019 g, 0.054 mmol) was added. The mixture was stirred slowly overnight at room temperature. The resultant solid was centrifuged out of suspension and washed with THF 4-5 times. Pyrim-UiO-IrCl<sub>3</sub> has 28% solvent weight based on TGA analysis and 32% Ir-loading based on ICP-OES analysis.

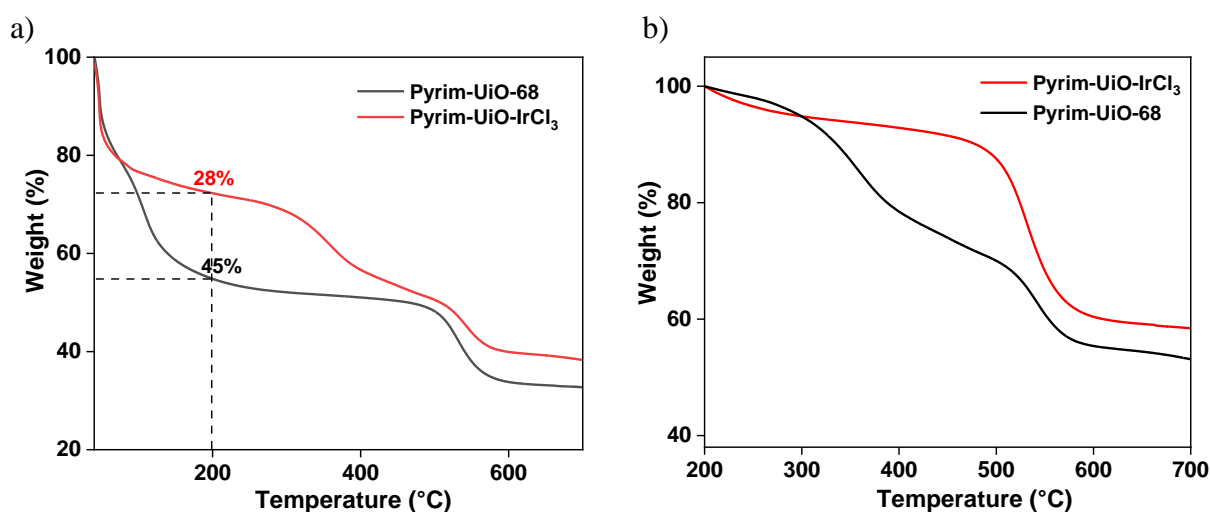

**Figure S2.** (a) TGA curve of freshly prepared pyrim-UiO-68 and pyrim-UiO-IrCl<sub>3</sub>. A solvent weight loss of 45% was observed in pyrim-UiO-68 and 28% in pyrim-UiO-IrCl<sub>3</sub> at the range of temperature from 40 °C to 200 °C. (b) TGA curve of freshly prepared pyrim-UiO-68 (black) and pyrim-UiO-IrCl<sub>3</sub> (red) from 200-700 °C. The increased weight of metalated MOF is due to the presence of iridium within the MOF.

#### 3.2 Synthesis of pyrim-UiO-IrH.

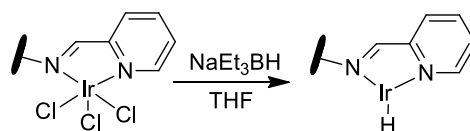

Pyrim-UiO-IrCl<sub>3</sub> (0.016 g, 0.0038 mmol) was charged into a vial containing 3 mL of THF. NaEt<sub>3</sub>BH (15 μL, 1 M in toluene) was added dropwise to the vial, and the mixture was stirred gently for 1 h at room temperature to give pyrim-UiO-IrH as black colored solid. The resultant MOF catalyst was separated via centrifugation and then washed with THF several times. Pyrim-UiO-IrH was then used directly for the catalysis.

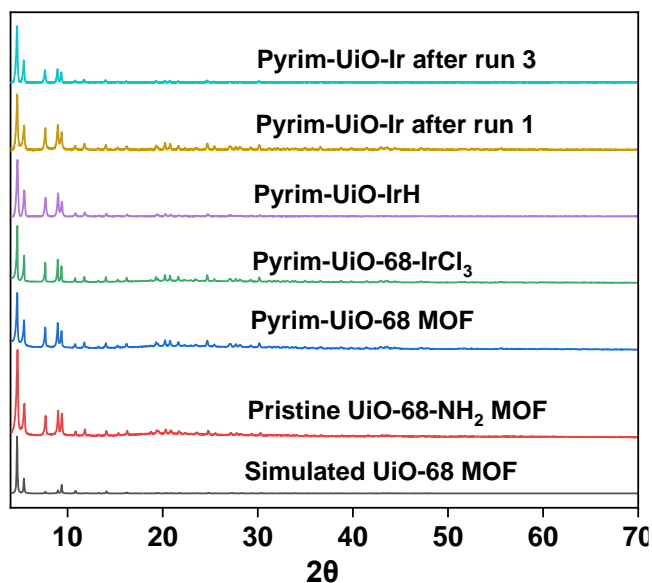

**Figure S3.** PXRD patterns of simulated UiO-68 MOF (black), pristine UiO-68-NH<sub>2</sub> MOF (red), pyrim-UiO-68 MOF (blue), pyrim-UiO-IrCl<sub>3</sub> (green), pyrim-UiO-IrH (violet), pyrim-UiO-Ir after run 1 (mustard brown) and pyrim-UiO-Ir after run 3 (light blue).

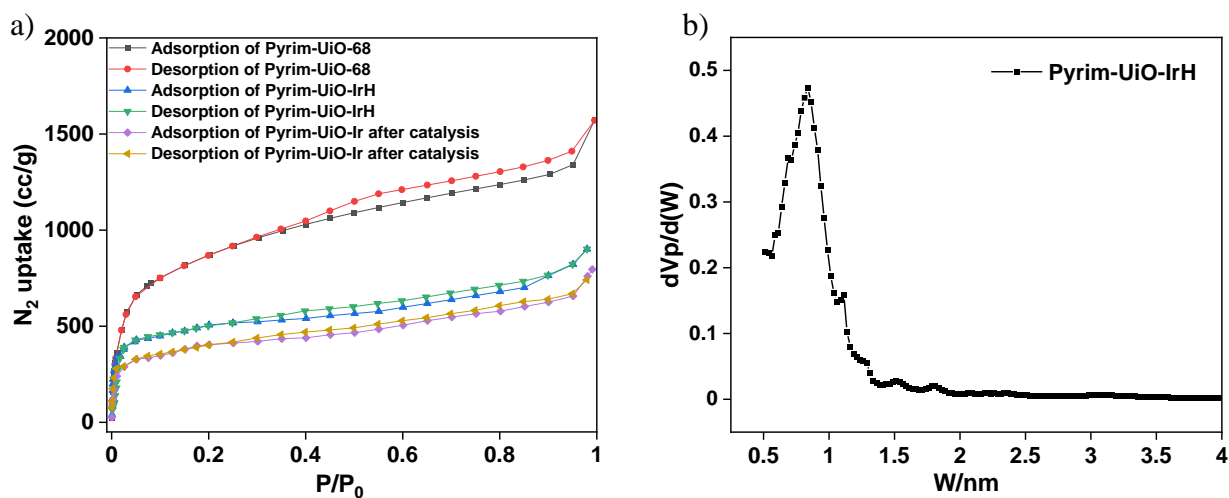

**Figure S4.** a) Brunauer–Emmett–Teller (BET) nitrogen sorption isotherms of pyrim-UiO-68, pyrim-UiO-IrH and pyrim-UiO-Ir after catalysis measured at 77 K. Pyrim-UiO-68 and pyrim-UiO-IrH have a BET surface area of 2342 m<sup>2</sup>/g and 1245 m<sup>2</sup>/g respectively. b) HK pore distribution plot of pyrim-UiO-IrH. Pore size for pyrim-UiO-IrH was determined to be 0.8 nm.

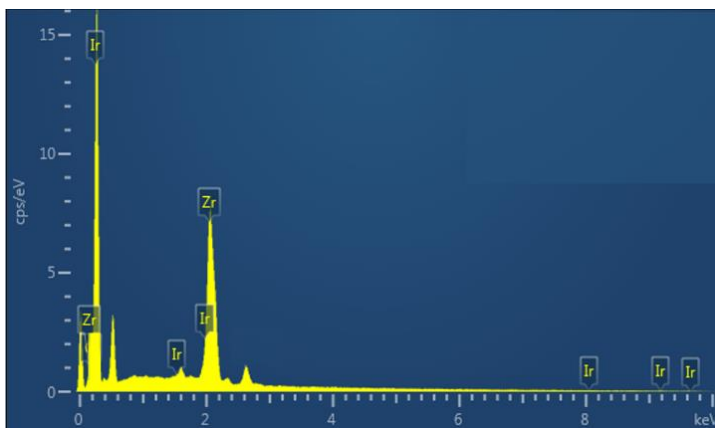

**Figure S5.** SEM-EDX analysis of pyrim-UiO-IrH.

### 3.3. Synthesis of homogeneous pyridylimine-iridium complex.

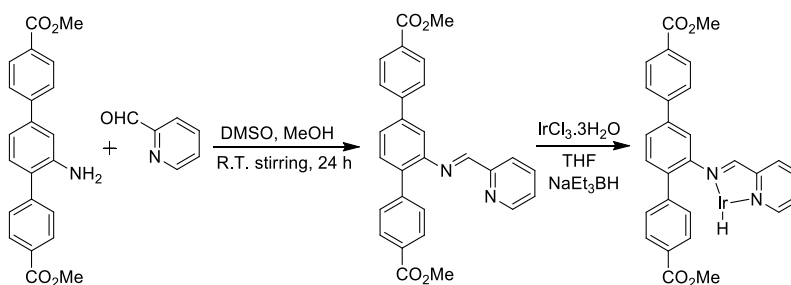

Under inert condition, dimethyl 2'-amino-[1,1':4',1''-terphenyl]-4,4''-dicarboxylate (0.200 g, 0.553 mmol) was dissolved in 30 mL of DMSO in a 50 mL Schlenk flask. To the reaction mixture, 1 mL of methanol was added followed by the addition of 2-pyridine carboxaldehyde (0.073 mL, 0.774 mmol). The resulting clear light-yellow colour solution was stirred for 24 h at room temperature. A light-yellow precipitate was formed, which was isolated through centrifugation followed by washing with methanol for three times and then dried under vacuum to afford the pyridylimine ligand as a yellow solid (0.180 g, 0.399 mmol, 72%).  $^1\text{H}$  NMR (500 MHz,  $\text{CDCl}_3$ ):  $\delta$  8.71 (s, 2 H), 8.14 (d,  $^3J_{\text{H-H}} = 8.2$  Hz, 2 H), 8.09 (s, 2 H), 8.02 (d,  $^3J_{\text{H-H}} = 7.9$  Hz, 1 H), 7.77 (dd,  $^3J_{\text{H-H}} = 14.0, 8.2$  Hz, 3 H), 7.66 – 7.58 (m, 4 H), 7.44 (s, 1 H), 7.40 – 7.36 (m, 1 H), 3.95 (d,  $^3J_{\text{H-H}} = 6.8$  Hz, 6 H).  $m/z$  (ESI) Anal calcd. for  $\text{C}_{28}\text{H}_{23}\text{N}_2\text{O}_4[\text{M}+\text{H}]^+$ : 451.1658; Found: 451.1641 (err. -3.7 ppm).

In a vial, the pyridylimine ligand, dimethyl 2'-((pyridin-2-ylmethylene)amino)-[1,1':4',1''-terphenyl]-4,4''-dicarboxylate (0.036 g, 0.080 mmol), was added to a solution of  $\text{IrCl}_3 \cdot 3\text{H}_2\text{O}$  (0.028 g, 0.080 mmol) in THF (until saturated). It was then left overnight, the pyridylimine-iridium complex was obtained.  $\text{NaEt}_3\text{BH}$  (15  $\mu\text{L}$ , 1 M in toluene) was added dropwise to the vial containing complex, and the mixture was stirred gently for 1 h at room temperature to give pyridylimine-iridium hydride complex.

## 4. Catalytic reactions with pyrim-UiO-IrH.

### 4.1. General procedure for pyrim-UiO-IrH catalysed borylation of methane.

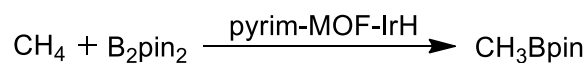

In the glovebox, pyrim-UiO-IrH (0.5 mol% of Ir) in 2 mL solvent was transferred into a glass liner. B<sub>2</sub>pin<sub>2</sub> was subsequently added to the liner, which was then securely fitted into a high-pressure reactor and sealed. The sealed Parr reactor was then removed from the glovebox and purged with CH<sub>4</sub> two to three times. Subsequently, the Parr reactor was pressurized to 20-40 bar with CH<sub>4</sub> and heated to a temperature range of 110-150 °C, where it was maintained for a duration of 10 to 48 hours. The reactor was subsequently cooled, and the pressure was released. The MOF was separated from the reaction mixture through centrifugation, and the resulting supernatant was analyzed using GC-MS and GC-FID to determine the conversion and yield for CH<sub>3</sub>Bpin.

**Table S1. Optimization reaction conditions for borylation of methane.<sup>a</sup>**

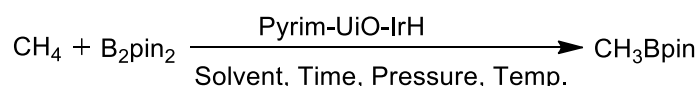

| Entry          | Catalyst                        | Borylating agent                               | Temperature (°C) | Pressure (bar) | Time (h)    | Solvent    | %GC-Yield (Selectivity) |
|----------------|---------------------------------|------------------------------------------------|------------------|----------------|-------------|------------|-------------------------|
| 1              | Pyrim-UiO-IrH (0.5 mol%)        | B <sub>2</sub> pin <sub>2</sub> (0.2 mmol)     | 130              | 40             | 12 h        | CyH        | 54 (98)                 |
| 2              | Pyrim-UiO-IrH (0.5 mol%)        | B <sub>2</sub> pin <sub>2</sub> (0.2 mmol)     | 130              | 40             | 18 h        | CyH        | 85 (98)                 |
| <b>3</b>       | <b>Pyrim-UiO-IrH (0.5 mol%)</b> | <b>B<sub>2</sub>pin<sub>2</sub> (0.2 mmol)</b> | <b>130</b>       | <b>40</b>      | <b>24 h</b> | <b>CyH</b> | <b>98 (98)</b>          |
| 4              | Pyrim-UiO-IrH (0.5 mol%)        | B <sub>2</sub> pin <sub>2</sub> (0.2 mmol)     | 130              | 40             | 30 h        | CyH        | 90 (90)                 |
| 5              | Pyrim-UiO-IrH (0.5 mol%)        | B <sub>2</sub> pin <sub>2</sub> (0.2 mmol)     | 130              | 40             | 48 h        | CyH        | 82 (82)                 |
| 6              | Pyrim-UiO-IrH (0.5 mol%)        | B <sub>2</sub> pin <sub>2</sub> (0.2 mmol)     | 110              | 40             | 24 h        | CyH        | 19 (95)                 |
| 7 <sup>b</sup> | Pyrim-UiO-IrH (0.5 mol%)        | B <sub>2</sub> pin <sub>2</sub> (0.2 mmol)     | 150              | 40             | 24 h        | CyH        | 78 (78)                 |
| 8              | Pyrim-UiO-IrH (0.5 mol%)        | B <sub>2</sub> pin <sub>2</sub> (0.2 mmol)     | 130              | 20             | 24 h        | CyH        | 26 (96)                 |
| 9              | Pyrim-UiO-IrH (0.5 mol%)        | B <sub>2</sub> pin <sub>2</sub> (0.2 mmol)     | 130              | 30             | 24 h        | CyH        | 47 (98)                 |



|                 |                                                    |                                               |     |    |      |         |         |
|-----------------|----------------------------------------------------|-----------------------------------------------|-----|----|------|---------|---------|
| 10              | Pyrim-UiO-IrH<br>(0.3 mol%)                        | B <sub>2</sub> pin <sub>2</sub><br>(0.2 mmol) | 130 | 40 | 24 h | CyH     | 30 (98) |
| 11              | Pyrim-UiO-IrH<br>(0.5 mol%)                        | B <sub>2</sub> pin <sub>2</sub><br>(0.2 mmol) | 130 | 40 | 24 h | THF     | 29 (33) |
| 12              | Pyrim-UiO-IrH<br>(0.5 mol%)                        | B <sub>2</sub> pin <sub>2</sub><br>(0.2 mmol) | 130 | 40 | 24 h | Toluene | 35 (44) |
| 13              | Pyrim-UiO-IrH<br>(0.5 mol%)                        | B <sub>2</sub> pin <sub>2</sub><br>(0.2 mmol) | 130 | 40 | 24 h | Heptane | 72 (86) |
| 14              | Pyrim-UiO-IrH<br>(0.5 mol%)                        | B <sub>2</sub> pin <sub>2</sub><br>(0.2 mmol) | 130 | 40 | 24 h | DMF     | 21 (24) |
| 15              | No catalyst                                        | B <sub>2</sub> pin <sub>2</sub><br>(0.2 mmol) | 130 | 40 | 24 h | CyH     | 0       |
| 16              | Pyrim-UiO-68                                       | B <sub>2</sub> pin <sub>2</sub><br>(0.2 mmol) | 130 | 40 | 24 h | CyH     | 0       |
| 17              | IrCl <sub>3</sub> .3H <sub>2</sub> O<br>(0.5 mol%) | B <sub>2</sub> pin <sub>2</sub><br>(0.5 mmol) | 130 | 40 | 24 h | CyH     | 0       |
| 18 <sup>c</sup> | Pyrim-UiO-IrH<br>(0.5 mol%)                        | HBpin<br>(0.2 mmol)                           | 130 | 40 | 24 h | CyH     | 0       |

<sup>a</sup>Reaction conditions: 1.9 mg of pyrim-UiO-IrH (1.02 μmol of Ir), 51 mg B<sub>2</sub>pin<sub>2</sub> (0.2 mmol), 2 mL solvents. <sup>b</sup>Lower yield was due to the generation of sol-Bpin and oxygenated byproducts such as HOBpin and pinBOBpin, stemming from the interaction of B<sub>2</sub>pin<sub>2</sub> with OH groups residing on the Zr<sub>6</sub> nodes of the MOF.<sup>6,7</sup> <sup>c</sup>HBpin was used as the borylating agent.

#### 4.2. Blank reaction of pyrim-UiO-IrH with B<sub>2</sub>pin<sub>2</sub> under N<sub>2</sub> without methane.

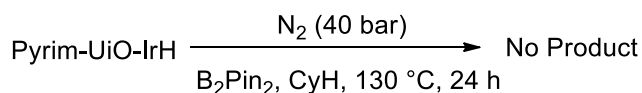

In the glovebox, pyrim-UiO-IrH (1.9 mg, 0.5 mol% of Ir) in 2 mL cyclohexane was transferred into a glass liner. B<sub>2</sub>pin<sub>2</sub> (51 mg, 0.2 mmol) was subsequently added to the liner, which was then securely fitted into a high-pressure reactor and sealed. The sealed Parr reactor was then removed from the glovebox and purged with N<sub>2</sub> two to three times. The reactor was pressurized with 40 bar nitrogen and then heated at 130 °C for 24 h without any mechanical stirring. The reactor was subsequently cooled, and the pressure was released. The MOF was separated from the reaction mixture through centrifugation, and the resulting supernatant was analyzed using GC-MS and GC-FID to determine the conversion and yield for CH<sub>3</sub>Bpin. In this reaction, no trace of products was formed, suggesting CH<sub>4</sub> as the sole carbon source for CH<sub>3</sub>Bpin in the pyrim-UiO-IrH catalyzed methane borylation.

### 4.3. Test for “heterogeneity” of pyrim-UiO-IrH in borylation of CH<sub>4</sub>.

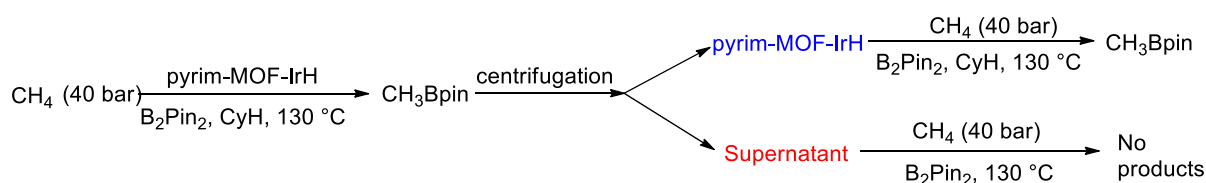

**Figure S6.** Heterogeneity test of pyrim-UiO-IrH for the borylation of methane.

In the glovebox, pyrim-UiO-IrH (1.9 mg, 0.5 mol% of Ir) in 2 mL cyclohexane was transferred into a glass liner. B<sub>2</sub>pin<sub>2</sub> (51 mg, 0.2 mmol) was subsequently added to the liner, which was then securely fitted into a high-pressure reactor and sealed. The sealed Parr reactor was then removed from the glovebox and purged with CH<sub>4</sub> two to three times. The reactor was pressurized with 40 bar methane and then heated at 130 °C for 24 h without any mechanical stirring. The system was subsequently cooled, and the pressure was released. The solid MOF was removed from suspension to separate the solid and the supernatant, inside the glove box and washed with cyclohexane multiple times.

Two reactions were set up separately in two different Parr reactors, one with the solid and the other one with the supernatant recovered from the previous reaction. The extracted solid and supernatant were added into two separate liners, and B<sub>2</sub>pin<sub>2</sub> (51 mg, 0.2 mmol) was added to each liner. 2 mL cyclohexane was added to the liner containing the solid MOF. Then both the liners were fitted into two separate Parr reactors and sealed. The sealed Parr reactors were taken out from the glovebox and purged with CH<sub>4</sub> gas two times. The Parr reactors were pressurized to 40 bar of CH<sub>4</sub> and stirred at 130°C for 24 h. After the completion of the reaction, the pressure of the reactors was released. The reactions were analysed with the GC-MS and GC-FID, which showed that the reaction with the solid MOF gave 98% yield, while the reaction with supernatant gave 0% conversion. This experiment excludes the potential of any leached Ir-species responsible for catalysis and confirms that solid pyrim-UiO-IrH was the actual catalyst for the borylation of methane.

### 4.4. Recycling of pyrim-UiO-IrH for the borylation of methane.

The recycle and reuse experiment was conducted at ~50-60% conversion to check the stability of the pyrim-UiO-IrH MOF-catalyst (Table S2). The detailed procedure of recycling experiment given below.

In the glovebox, pyrim-UiO-IrH (1.9 mg, 0.5 mol% of Ir) in 2 mL cyclohexane was transferred into a glass liner. B<sub>2</sub>pin<sub>2</sub> (51 mg, 0.2 mmol) was subsequently added to the

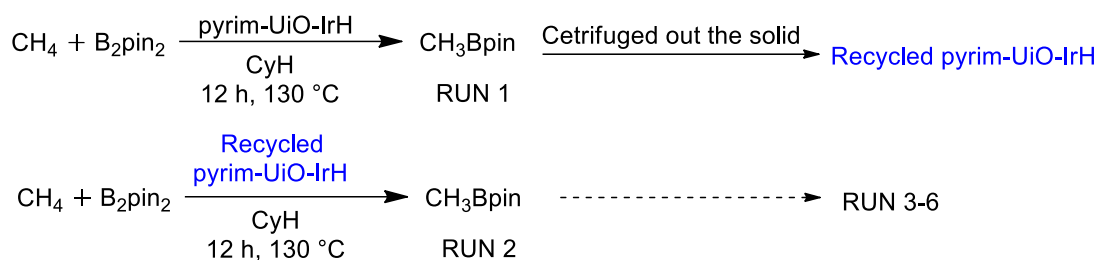

**Figure S7.** Recycle and reuse of pyrim-UiO-IrH in borylation of methane.

liner, which was then securely fitted into a high-pressure reactor and sealed. The sealed Parr reactor was then removed from the glovebox and purged with CH<sub>4</sub> two to three times. The reactor was pressurized with 40 bar methane and then heated at 130 °C for 12 h without any mechanical stirring. The system was subsequently cooled, and the pressure was released. The solid MOF was removed from suspension to separate the solid and the supernatant, inside the glove box and washed with cyclohexane multiple times. The yield of CH<sub>3</sub>Bpin was determined by GC-MS and GC-FID analysis. The solid MOF was then recycled.

Inside the glovebox, the recovered MOF-catalyst was again added to the glass liner. 2 mL cyclohexane and B<sub>2</sub>pin<sub>2</sub> (51 mg, 0.2 mmol) were added to the glass liner and sealed it in a Parr reactor. The Parr reactor was taken out from the glove box and was purged with the CH<sub>4</sub> gas and then pressurized it to 40 bar of CH<sub>4</sub>. The reactor was heated at 130 °C for 12 h. After the reaction, the solution was analyzed in the same way as mentioned previously in run 1. The recycling and reuse experiments were performed up to 5 times in total.

**Table S2. %Conversion of B<sub>2</sub>pin<sub>2</sub>, %GC-Yield of CH<sub>3</sub>Bpin and the leaching of Ir and Zr at various runs of the recycling of pyrim-UiO-IrH in the borylation of methane.**

| Run   | Time | %Conv. (B <sub>2</sub> pin <sub>2</sub> ) | %GC-Yield | %Leaching (Ir, Zr) |
|-------|------|-------------------------------------------|-----------|--------------------|
| Run-1 | 12 h | 56                                        | 55        | 0.013, 0.03        |
| Run-2 | 12 h | 55                                        | 54        |                    |
| Run-3 | 12 h | 59                                        | 58        | 0.04, 0.06         |
| Run-4 | 12 h | 53                                        | 51        |                    |
| Run-5 | 12 h | 54                                        | 52        | 0.06, 0.08         |
| Run-6 | 12 h | 53                                        | 50        |                    |

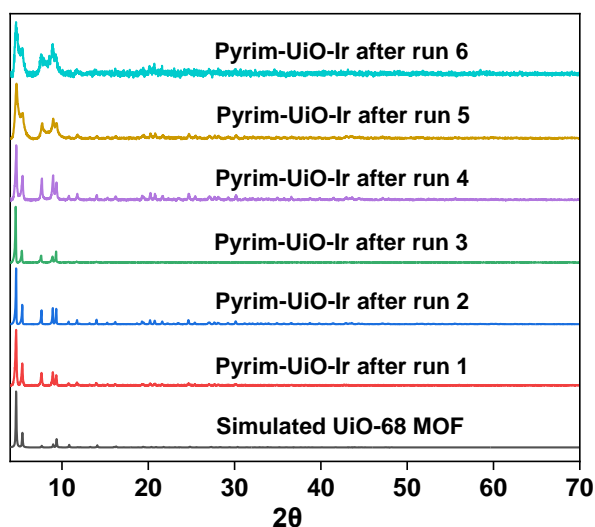

**Figure S8.** PXRD patterns of simulated UiO-68 MOF (black), pyrim-UiO-Ir after run 1 (red), pyrim-UiO-Ir after run 2 (blue), pyrim-UiO-Ir after run 3 (green), pyrim-UiO-Ir after run 4 (violet), pyrim-UiO-Ir after run 5 (mustard brown) and pyrim-UiO-Ir after run 6 (light blue).

**4.5. Investigation of the effect of pore sizes on the rate of catalysis.** The effect of pore sizes on the rate of catalytic reaction was investigated by comparing the rate of borylation reactions of methane catalyzed by pyrim-UiO-IrH with that of pyrim-UiO-66-IrH under identical reaction conditions. Pyrim-UiO-66-IrH has the same topology but smaller pore sizes compared to pyrim-UiO-IrH.

**4.5.1 Synthesis and characterizations of pyrim-UiO-66-IrH.** The synthesis was performed following a modified procedure.<sup>8</sup> In a vial, 2- aminoterephthalic acid (0.032 g, 0.176 mmol) was dissolved in a DMF solution (4.5 mL) followed by the addition of  $ZrCl_4$  (0.044 g, 0.188 mmol). The mixture was sonicated for 20 minutes and then placed in a teflon sealed hydro bomb and heated at 120 °C for 24 h. After cooling to room temperature, the crystalline solids were isolated by centrifugation and washed by DMF several times to afford UiO-66-NH<sub>2</sub> MOF. UiO-66-NH<sub>2</sub>-MOF was functionalized with pyridylimine moiety. In a 1.5 mL centrifuge tube, UiO-66-NH<sub>2</sub> MOF (0.017 g, 0.016 mmol) was added in 1 mL DMF followed by addition of 2-pyridinecarboxaldehyde (6 μL, 0.056 mmol). It was then left overnight with periodic shaking. The solid was washed various times with DMF to obtain pyrim-UiO-66 as light brown solid. Pyrim-UiO-66 MOF (0.020 g, 0.009 mmol) in THF was charged into a vial, and then 1 mL THF solution of  $IrCl_3 \cdot 3H_2O$  (0.019 g, 0.054 mmol) was added to it. The mixture was stirred slowly overnight at room temperature. The resultant solid was centrifuged out of suspension and washed with THF 4-5 times. Pyrim-UiO-66- $IrCl_3$  has 28% Ir-loading based on ICP-OES



(pyrim-UiO-IrH) have comparatively higher efficiency than the smaller pore size pyrim-UiO-66-IrH MOF due to the facile diffusion of substrates into the larger pores of pyrim-UiO-IrH.

#### 4.6. C–H borylation of methane using pyrim-MOF-IrH and its homogeneous control [Ph(pyrim)(PhCO<sub>2</sub>Me)<sub>2</sub>]IrH as catalysts under identical conditions to compare their catalytic activities.

Out of the two Parr reactors, one was charged with B<sub>2</sub>pin<sub>2</sub> (51 mg, 0.2 mmol), [Ph(pyrim)(PhCO<sub>2</sub>Me)<sub>2</sub>]IrH (0.0007 g, 0.0011 mmol) and cyclohexane (2 mL) and another reactor was charged with B<sub>2</sub>pin<sub>2</sub> (51 mg, 0.2 mmol), pyrim-UiO-IrH (1.9 mg, 0.5 mol% Ir) and cyclohexane (2 mL) in a glovebox. Both the reactors were purged twice with CH<sub>4</sub>, then charged with 40 bar CH<sub>4</sub> each and stirred at 130 °C for 24 h. After the completion of the reaction, the pressure from the reactors were released. The yield (%) of the products were monitored by GC-MS and GC-FID (Figure S11).

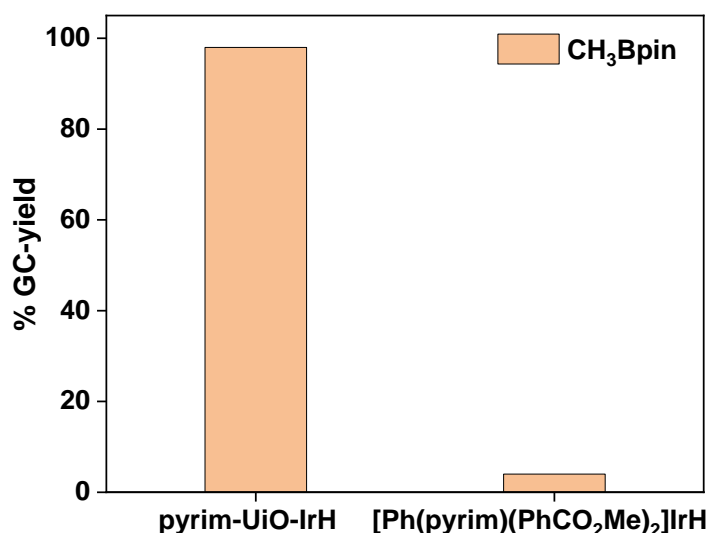

**Figure S11.** C–H borylation of methane using pyrim-UiO-IrH and its homogeneous control [Ph(pyrim)(PhCO<sub>2</sub>Me)<sub>2</sub>]IrH as catalysts under identical conditions.

**Table S3. Comparison of pyrim-UiO-IrH with its homogeneous control [Ph(pyrim)(PhCO<sub>2</sub>Me)<sub>2</sub>]IrH in the borylation of methane under similar condition.**

| Catalyst                                           | Ir (μmol) | Conv. of B <sub>2</sub> Pin <sub>2</sub> (%) | CH <sub>3</sub> Bpin (%) | CH <sub>2</sub> (Bpin) <sub>2</sub> (%) | HBpin (%) | HOBpin (%) | solvBpin (%) | TON |
|----------------------------------------------------|-----------|----------------------------------------------|--------------------------|-----------------------------------------|-----------|------------|--------------|-----|
| Pyrim-UiO-IrH                                      | 1.02      | 100                                          | 98                       | 0                                       | 0         | 1          | 1            | 196 |
| [Ph(pyrim)(PhCO <sub>2</sub> Me) <sub>2</sub> ]IrH | 1.1       | 11                                           | 4                        | 1                                       | 0         | 5          | 1            | 8   |

Reaction conditions: 2 mL of C<sub>6</sub>H<sub>12</sub>, 51 mg B<sub>2</sub>pin<sub>2</sub> (0.2 mmol), 130 °C, 40 bar CH<sub>4</sub> and 24 h.

## 5. Analysis and quantification of CH<sub>3</sub>Bpin by GC-MS and GC-FID.

A) The conversions and yields of the reactions were determined by Agilent 7890B gas chromatograph equipped with a flame ionisation detector (FID) and a mass detector (Agilent 5977B GC/MSD) and a HP-5MS Ultra Inert 30m-250 $\mu$ m-0.25 $\mu$ m column. GC conditions: Inj: 220 °C; Det: 250 °C; Column temp: 40 °C followed by a ramp of 5 °C/min to 240 °C; Column flow: 1.0 mL/min.

The conversion and yield of CH<sub>3</sub>Bpin were determined for each reaction run by measuring the relative amount of boron species through the corrected integration of GC-MS peaks as follows.<sup>7</sup>

$$\text{Conversion\%} = \left[ 1 - \frac{\text{B}_2\text{Pin}_2 \text{ remaining}}{(\text{B}_2\text{Pin}_2 + \text{CH}_3\text{Bpin} + \text{HOBpin} + \text{SolBpin} + \text{etc})} \right] \times 100\%$$

$$\text{Yield of CH}_3\text{Bpin\%} = \left[ \frac{\text{CH}_3\text{Bpin}}{(\text{B}_2\text{Pin}_2 + \text{CH}_3\text{Bpin} + \text{HOBpin} + \text{SolBpin} + \text{etc})} \right] \times 100\%$$

$$\text{Selectivity of CH}_3\text{Bpin\%} = \left[ \frac{\text{CH}_3\text{Bpin}}{\text{Overall product formed}} \right] \times 100\%$$

$$\text{TON of CH}_3\text{Bpin} = \frac{\% \text{ Yield of CH}_3\text{Bpin}}{\% \text{ Ir Loading}}$$

a)

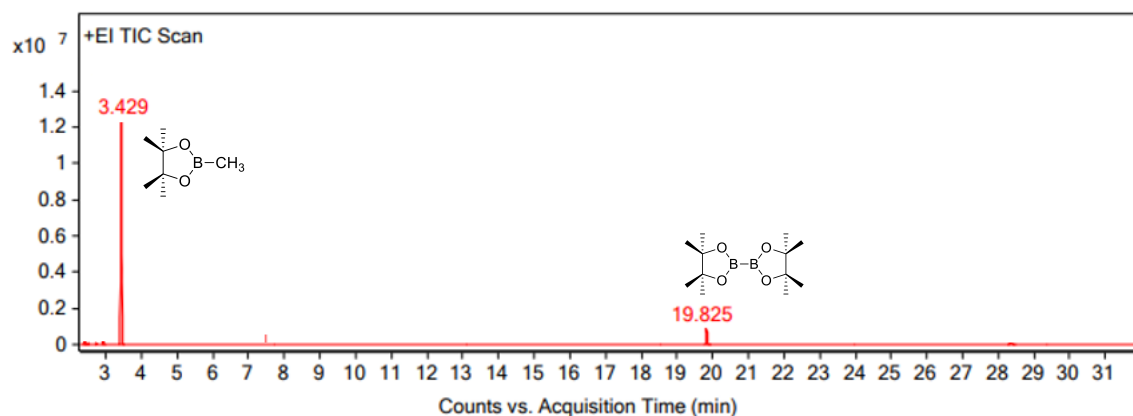

b)

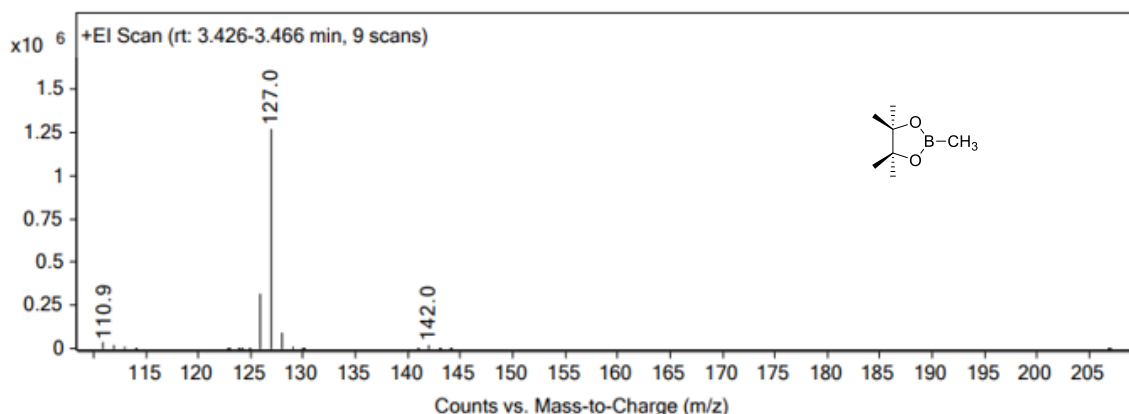

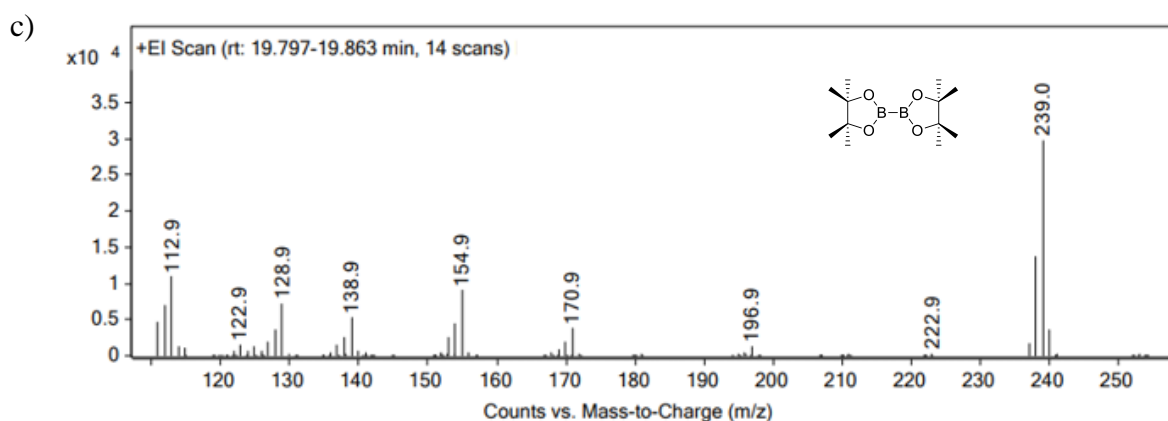

**Figure S12.** The GC-MS spectra of the crude reaction mixture after 18 h of catalysis (87%  $B_2pin_2$  conversion) using pyrim-UiO-IrH. Reaction conditions: 1.9 mg of pyrim-UiO-IrH (1.02  $\mu$ mol of Ir), 2 mL of  $C_6H_{12}$ , 51 mg  $B_2pin_2$  (0.2 mmol), 130  $^{\circ}C$ , 40 bar  $CH_4$  and 18 h.

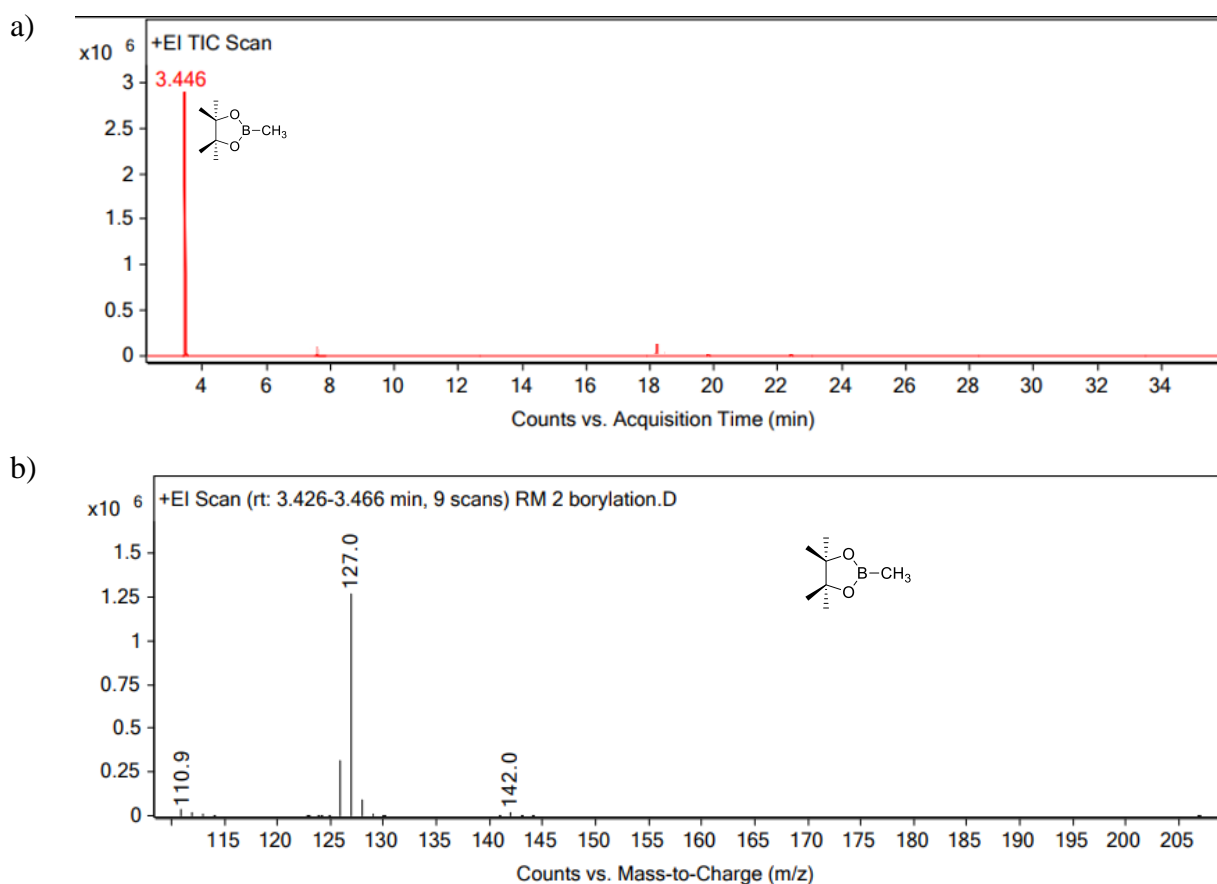

**Figure S13.** The GC-MS spectra of the crude reaction mixture after 24 h of catalysis (100%  $B_2pin_2$  conversion) using pyrim-UiO-IrH. Reaction conditions: 1.9 mg of pyrim-UiO-IrH (1.02  $\mu$ mol of Ir), 2 mL of  $C_6H_{12}$ , 51 mg  $B_2pin_2$  (0.2 mmol), 130  $^{\circ}C$ , 40 bar  $CH_4$  and 24 h.



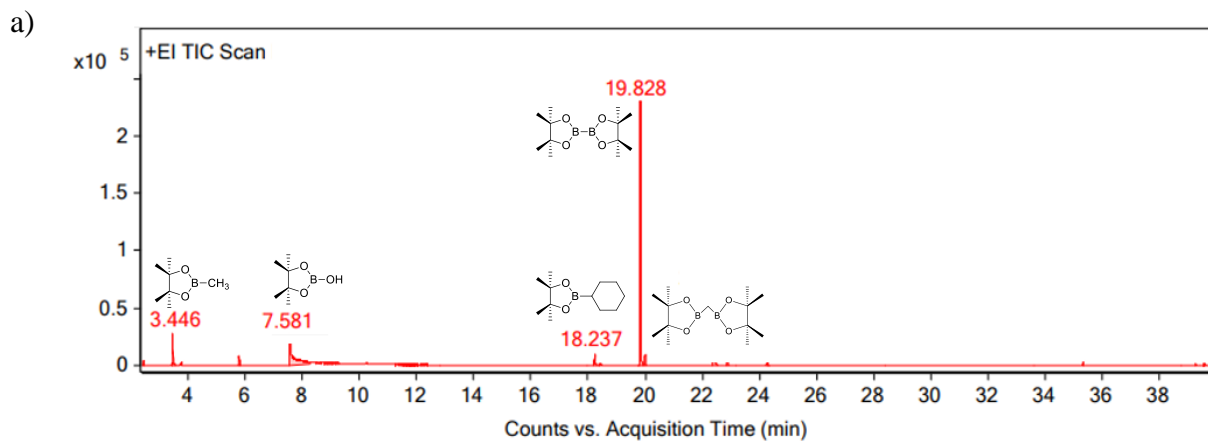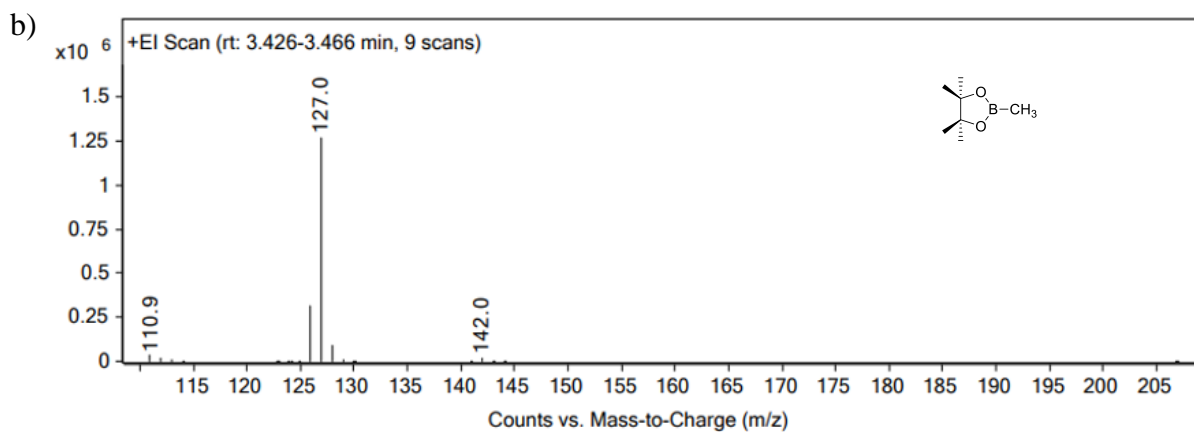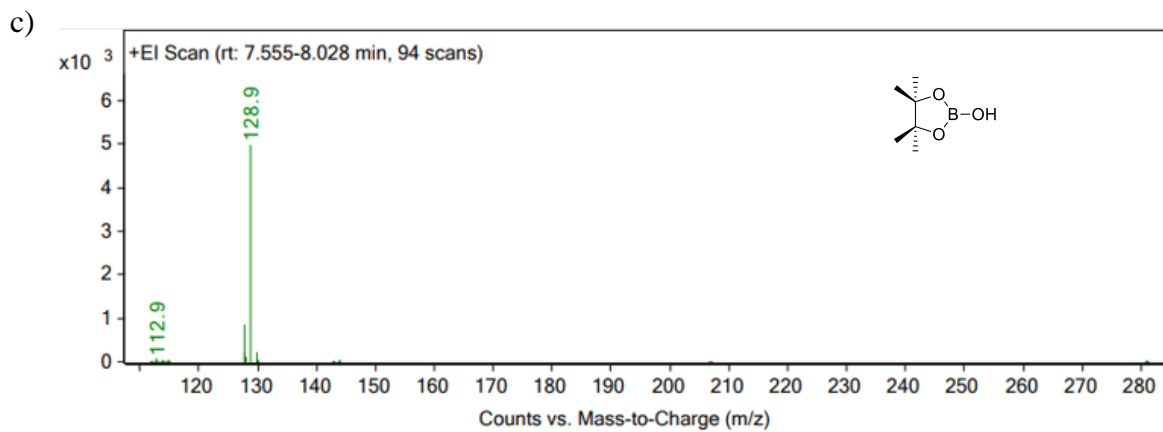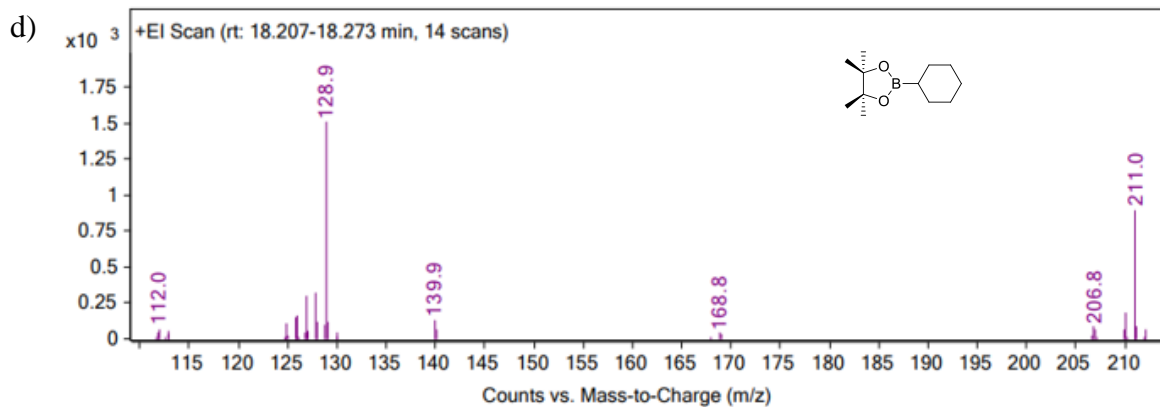

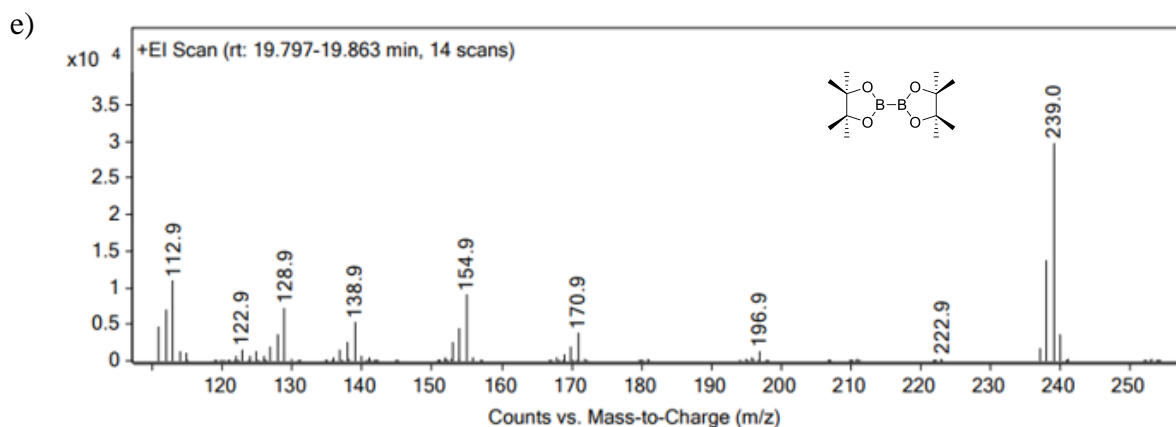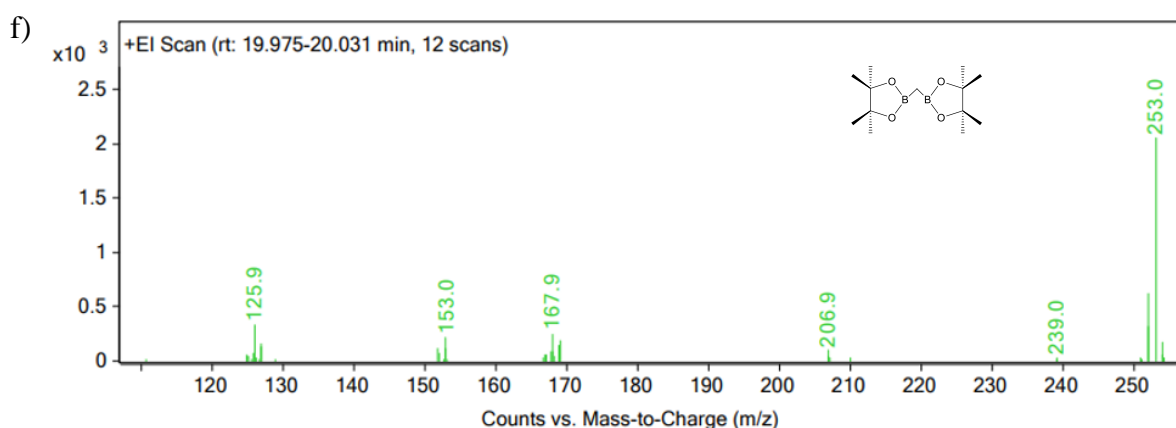

**Figure S14.** The GC-MS spectra of the crude reaction mixture after 24 h of catalysis (11% B<sub>2</sub>pin<sub>2</sub> conversion) using [Ph(pyrim)(PhCO<sub>2</sub>Me)<sub>2</sub>]IrH as the homogeneous control. Reaction conditions 0.0007 g of [Ph(pyrim)(PhCO<sub>2</sub>Me)<sub>2</sub>]IrH (1.1 μmol of Ir), 2 mL of C<sub>6</sub>H<sub>12</sub>, 51 mg B<sub>2</sub>pin<sub>2</sub> (0.2 mmol), 130 °C, 40 bar CH<sub>4</sub> and 24 h.

**B)** The yield of CH<sub>3</sub>Bpin under optimized conditions [1.02 μmol of Ir, B<sub>2</sub>pin<sub>2</sub> (0.2 mmol), 2 mL C<sub>6</sub>H<sub>12</sub>, 130 °C, 40 bar CH<sub>4</sub> and 24 h] was also determined by GC analysis using mesitylene as an internal standard. First, we made a GC-calibration curve using known quantities of MeBpin with mesitylene as an internal standard (I.S.) as shown below.

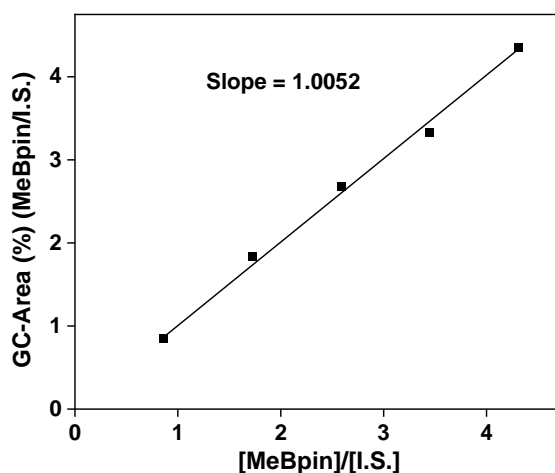

**Figure S15.** GC calibration plot employing various concentrations of MeBpin with mesitylene as an internal standard.

From the above calibration plot, slope = 1.0052

Analysis: [Mesitylene] = 0.07188618 M

%GC-Area of MeBpin peak = 57.68%

%GC-Area of Mesitylene peak = 42.32%

[MeBpin] =?

Now,

%GC-Area of MeBpin / %GC-Area of I.S. = Slope × [MeBpin] / [I.S.]

⇒ 57.68 / 42.32 = 1.0052 × [MeBpin] / 0.07188618

⇒ [MeBpin] = 0.0975 M

$M = n / V$

$n \text{ (mmol)} = M \times V \text{ (mL)}$

mmol of MeBpin produced = 0.0975 × 2 = 0.195 mmol [Since 2 mL of solvent was used]

% Yield (MeBpin) = mmol of product (MeBpin) / mmol of reactant taken × 100 %  
= (0.195/0.2) × 100 = 97.5%

(The absence of a peak corresponding to B<sub>2</sub>pin<sub>2</sub> in the GC spectrum indicates complete consumption of the reactant, signifying a full conversion rate)

The yields of MeBpin obtained using the GC-calibration curve is close to the value afforded from the alternative method described in above section 5A (SI), thereby confirming the reliability of our experimental protocol.

**6. DFT calculations.** All quantum chemical calculations were done using the density functional theory (DFT) functional B3LYP/genecp along with *sdd* basis set method for Ir and 6-31G basis set for C, N, H, O and B atoms as implemented in the Gaussian 16 software suite.<sup>9-</sup><sup>13</sup> Electronic structure complexes were optimized at the unrestricted level. All calculations were performed in the solvated state and at 403.15 K. We used the Polarizable Continuum Model (PCM) using the integral equation formalism variant (IEFPCM) as the default SCRF method by using THF as the solvent for pyrim-UiO-IrCl<sub>3</sub>(THF) at room temperature (298.15K) and cyclohexane as the solvent for all other molecules in this DFT calculation at 403.15 K. Each structure was first optimized, and then frequency calculation was performed to confirm its geometry and to obtain the thermochemical data.

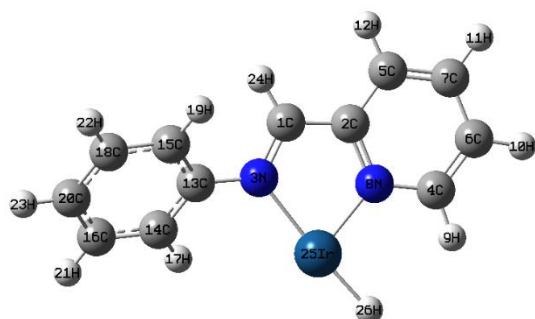

Pyrim-UiO-IrH

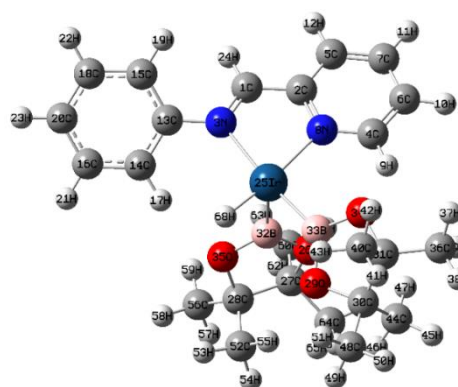

INT-1

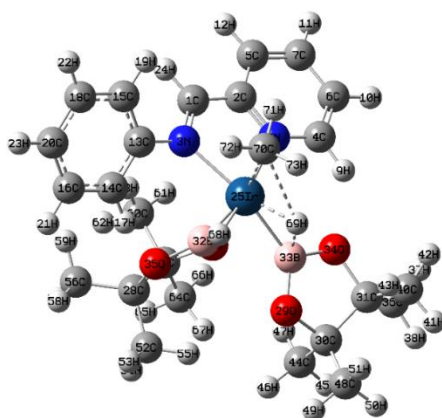

TS-1

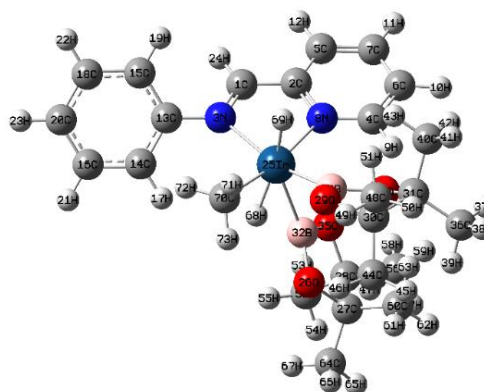

INT-2

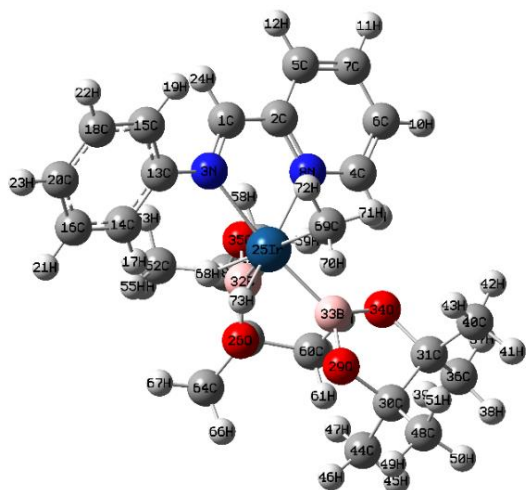

**INT-3**

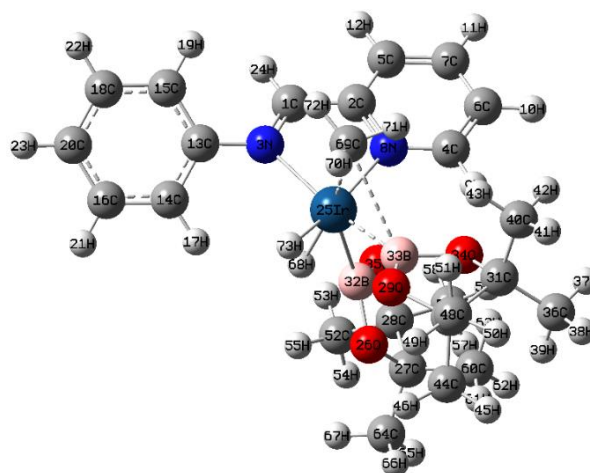

**TS-2**

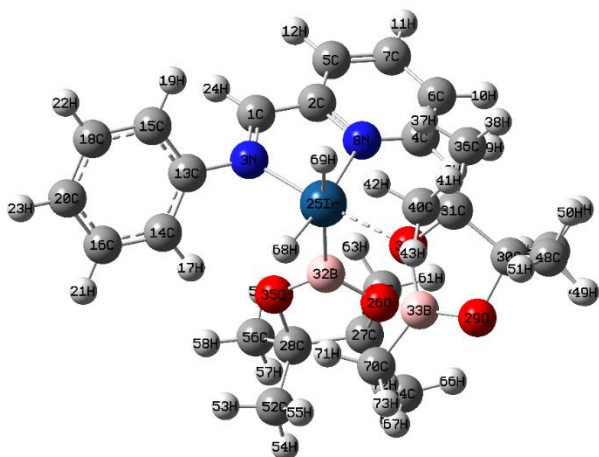

**INT-4**

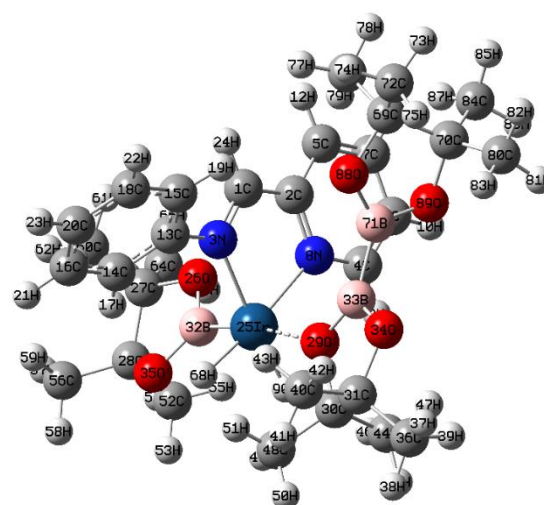

**INT-5**

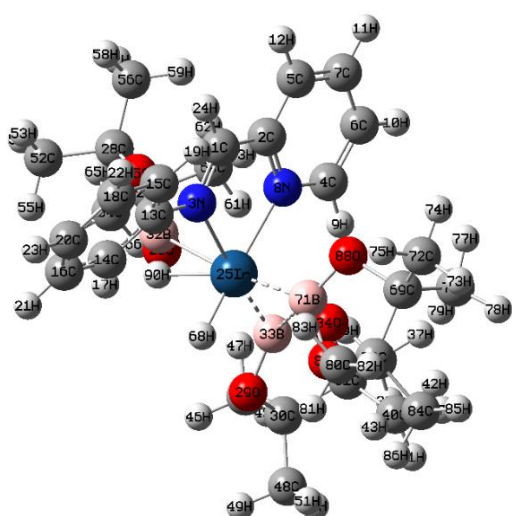

**TS-3**

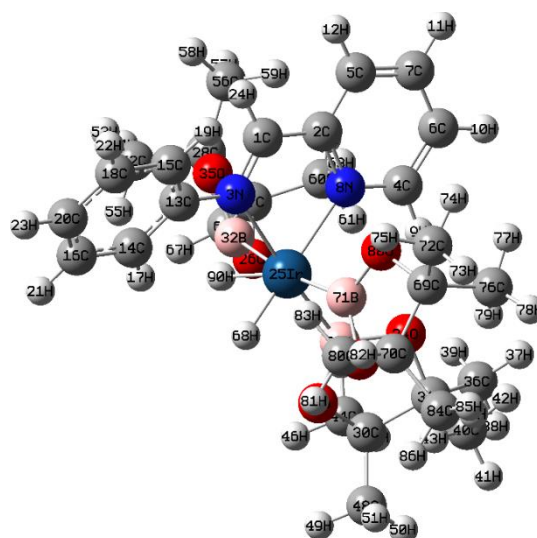

**INT-6**

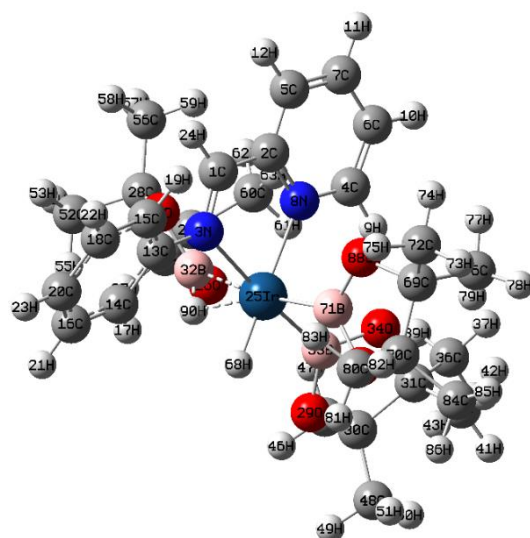

TS-4

**Figure S16.** DFT-optimized structures of intermediates and transition states of the catalytic cycle in pyrim-UiO-IrH catalysed methane borylation using B<sub>2</sub>pin<sub>2</sub>.

### 6.1. Cartesian coordinates of the DFT-optimized structures.

#### Cartesian coordinates of Pyrim-UiO-IrH

| S.No. | Atoms | Coordinates (Angstroms) |           |            |
|-------|-------|-------------------------|-----------|------------|
|       |       | X                       | Y         | Z          |
| 1     | C     | -14.186325              | -5.662331 | -12.600542 |
| 2     | C     | -13.696708              | -4.661369 | -11.705306 |
| 3     | N     | -14.333675              | -5.282408 | -13.858102 |
| 4     | C     | -12.955394              | -2.410745 | -11.535603 |
| 5     | C     | -13.480725              | -4.847629 | -10.331602 |
| 6     | C     | -12.732818              | -2.568860 | -10.174692 |
| 7     | C     | -12.997000              | -3.802325 | -9.552443  |
| 8     | N     | -13.435550              | -3.430502 | -12.316832 |
| 9     | H     | -12.765836              | -1.481978 | -12.050312 |
| 10    | H     | -12.355178              | -1.728139 | -9.605455  |
| 11    | H     | -12.827447              | -3.934828 | -8.490954  |
| 12    | H     | -13.698262              | -5.817356 | -9.898437  |
| 13    | C     | -14.758960              | -6.206432 | -14.862166 |
| 14    | C     | -15.608466              | -5.740958 | -15.880226 |
| 15    | C     | -14.322602              | -7.543773 | -14.871096 |
| 16    | C     | -16.032715              | -6.610653 | -16.888433 |
| 17    | H     | -15.940581              | -4.707588 | -15.856861 |
| 18    | C     | -14.745689              | -8.404998 | -15.887911 |
| 19    | H     | -13.634676              | -7.895579 | -14.109833 |
| 20    | C     | -15.602640              | -7.944369 | -16.896365 |
| 21    | H     | -16.696151              | -6.247364 | -17.666089 |
| 22    | H     | -14.397810              | -9.432588 | -15.897680 |
| 23    | H     | -15.925215              | -8.615935 | -17.684823 |
| 24    | H     | -14.434135              | -6.660362 | -12.254966 |
| 25    | Ir    | -13.784312              | -3.294161 | -14.232310 |
| 26    | H     | -13.286125              | -1.725904 | -14.413264 |
| 3     | N     | -14.209485              | -5.306337 | -14.130494 |
| 4     | C     | -11.902242              | -2.816219 | -11.888750 |
| 5     | C     | -12.744079              | -5.197099 | -10.765923 |
| 6     | C     | -11.558690              | -3.112052 | -10.563518 |
| 7     | C     | -11.981147              | -4.316503 | -9.993501  |
| 8     | N     | -12.640894              | -3.666922 | -12.638150 |
| 9     | H     | -11.594864              | -1.906946 | -12.393919 |
| 10    | H     | -10.966725              | -2.403644 | -9.996265  |
| 11    | H     | -11.724638              | -4.565721 | -8.970076  |
| 12    | H     | -13.094687              | -6.139040 | -10.358910 |
| 13    | C     | -15.000907              | -6.175041 | -14.953397 |
| 14    | C     | -16.098188              | -5.633963 | -15.641170 |
| 15    | C     | -14.692169              | -7.541861 | -15.066029 |
| 16    | C     | -16.902449              | -6.477626 | -16.412592 |
| 17    | H     | -16.306389              | -4.574304 | -15.539318 |
| 18    | C     | -15.491858              | -8.369878 | -15.860043 |
| 19    | H     | -13.815083              | -7.942651 | -14.567863 |
| 20    | C     | -16.603460              | -7.842637 | -16.527805 |
| 21    | H     | -17.762030              | -6.065834 | -16.931431 |
| 22    | H     | -15.241799              | -9.421003 | -15.961142 |
| 23    | H     | -17.225335              | -8.486919 | -17.140834 |
| 24    | H     | -14.224532              | -6.650760 | -12.533004 |
| 25    | Ir    | -13.285015              | -3.339631 | -14.783555 |
| 26    | O     | -14.832899              | -0.725751 | -14.297569 |
| 27    | C     | -16.197391              | -0.269809 | -13.892823 |
| 28    | C     | -17.116161              | -1.394715 | -14.506358 |
| 29    | O     | -11.951421              | -0.996241 | -16.412322 |
| 30    | C     | -11.269160              | 0.312018  | -16.188780 |
| 31    | C     | -10.545731              | 0.070442  | -14.811240 |
| 32    | B     | -14.847362              | -2.125970 | -14.538091 |
| 33    | B     | -12.190573              | -1.648481 | -15.169758 |
| 34    | O     | -11.435215              | -0.944031 | -14.172203 |
| 35    | O     | -16.200161              | -2.579081 | -14.490704 |
| 36    | C     | -10.474592              | 1.287124  | -13.890054 |
| 37    | H     | -9.987051               | 1.009377  | -12.949474 |
| 38    | H     | -9.888332               | 2.091575  | -14.350573 |
| 39    | H     | -11.471126              | 1.667165  | -13.657462 |
| 40    | C     | -9.165260               | -0.588137 | -14.952217 |
| 41    | H     | -8.426445               | 0.107866  | -15.364732 |
| 42    | H     | -8.821157               | -0.907870 | -13.963395 |

#### Cartesian coordinates of INT-1

| S.No. | Atoms | Coordinates (Angstroms) |           |            |
|-------|-------|-------------------------|-----------|------------|
|       |       | X                       | Y         | Z          |
| 1     | C     | -13.876811              | -5.699012 | -12.934968 |
| 2     | C     | -13.062349              | -4.846612 | -12.083608 |

|    |   |            |           |            |
|----|---|------------|-----------|------------|
| 43 | H | -9.214906  | -1.469558 | -15.598493 |
| 44 | C | -12.380138 | 1.369731  | -16.119575 |
| 45 | H | -11.970481 | 2.376970  | -15.982518 |
| 46 | H | -12.941161 | 1.348649  | -17.058936 |
| 47 | H | -13.078361 | 1.145885  | -15.308951 |
| 48 | C | -10.339933 | 0.576127  | -17.372433 |
| 49 | H | -10.935012 | 0.688271  | -18.284254 |
| 50 | H | -9.770841  | 1.501811  | -17.222287 |
| 51 | H | -9.638232  | -0.246485 | -17.526073 |
| 52 | C | -17.483657 | -1.147543 | -15.975516 |
| 53 | H | -17.988735 | -2.036287 | -16.366923 |
| 54 | H | -18.162728 | -0.293916 | -16.079341 |
| 55 | H | -16.589296 | -0.979634 | -16.580536 |
| 56 | C | -18.354557 | -1.743896 | -13.683776 |
| 57 | H | -19.031598 | -0.883598 | -13.616881 |
| 58 | H | -18.894978 | -2.563584 | -14.167774 |
| 59 | H | -18.091073 | -2.062280 | -12.672882 |
| 60 | C | -16.207784 | -0.241773 | -12.357918 |
| 61 | H | -15.398536 | 0.408633  | -12.012465 |
| 62 | H | -17.155310 | 0.147053  | -11.968672 |
| 63 | H | -16.042851 | -1.241297 | -11.944083 |
| 64 | C | -16.415794 | 1.130057  | -14.462201 |
| 65 | H | -17.434459 | 1.480397  | -14.256024 |
| 66 | H | -15.714832 | 1.829003  | -13.994687 |
| 67 | H | -16.246900 | 1.150162  | -15.540468 |
| 68 | H | -13.608677 | -3.338509 | -16.309609 |

#### Cartesian coordinates of TS-1

| S.No. | Atoms | Coordinates (Angstroms) |           |            |
|-------|-------|-------------------------|-----------|------------|
|       |       | X                       | Y         | Z          |
| 1     | C     | -13.831763              | -5.735345 | -12.948223 |
| 2     | C     | -13.017301              | -4.882945 | -12.096864 |
| 3     | N     | -14.164436              | -5.342670 | -14.143750 |
| 4     | C     | -11.857193              | -2.852553 | -11.902006 |
| 5     | C     | -12.699030              | -5.233432 | -10.779179 |
| 6     | C     | -11.513641              | -3.148385 | -10.576774 |
| 7     | C     | -11.936098              | -4.352836 | -10.006756 |
| 8     | N     | -12.595845              | -3.703255 | -12.651405 |
| 9     | H     | -11.549815              | -1.943279 | -12.407175 |
| 10    | H     | -10.921676              | -2.439977 | -10.009520 |
| 11    | H     | -11.679589              | -4.602054 | -8.983331  |
| 12    | H     | -13.049638              | -6.175373 | -10.372165 |
| 13    | C     | -14.955859              | -6.211374 | -14.966652 |
| 14    | C     | -16.053139              | -5.670296 | -15.654425 |
| 15    | C     | -14.647120              | -7.578195 | -15.079285 |
| 16    | C     | -16.857401              | -6.513959 | -16.425847 |
| 17    | H     | -16.261340              | -4.610637 | -15.552573 |
| 18    | C     | -15.446810              | -8.406211 | -15.873298 |
| 19    | H     | -13.770035              | -7.978984 | -14.581118 |
| 20    | C     | -16.558411              | -7.878970 | -16.541060 |
| 21    | H     | -17.716982              | -6.102167 | -16.944686 |
| 22    | H     | -15.196750              | -9.457336 | -15.974397 |
| 23    | H     | -17.180286              | -8.523252 | -17.154089 |
| 24    | H     | -14.179483              | -6.687093 | -12.546259 |
| 25    | Ir    | -13.239966              | -3.375964 | -14.796810 |
| 26    | O     | -14.787851              | -0.762084 | -14.310824 |
| 27    | C     | -16.152342              | -0.306142 | -13.906078 |
| 28    | C     | -17.071112              | -1.431048 | -14.519613 |
| 29    | O     | -11.906373              | -1.032574 | -16.425577 |
| 30    | C     | -11.224111              | 0.275685  | -16.202036 |
| 31    | C     | -10.500682              | 0.034109  | -14.824496 |
| 32    | B     | -14.802314              | -2.162303 | -14.551346 |
| 33    | B     | -12.145524              | -1.684814 | -15.183014 |
| 34    | O     | -11.390167              | -0.980364 | -14.185459 |
| 35    | O     | -16.155113              | -2.615415 | -14.503959 |
| 36    | C     | -10.429543              | 1.250791  | -13.903310 |
| 37    | H     | -9.942002               | 0.973044  | -12.962729 |
| 38    | H     | -9.843283               | 2.055242  | -14.363828 |
| 39    | H     | -11.426078              | 1.630832  | -13.670718 |
| 40    | C     | -9.120211               | -0.624470 | -14.965472 |
| 41    | H     | -8.381396               | 0.071533  | -15.377987 |
| 42    | H     | -8.776108               | -0.944203 | -13.976650 |
| 43    | H     | -9.169857               | -1.505892 | -15.611748 |

|    |   |            |           |            |
|----|---|------------|-----------|------------|
| 44 | C | -12.335090 | 1.333398  | -16.132830 |
| 45 | H | -11.925432 | 2.340637  | -15.995774 |
| 46 | H | -12.896113 | 1.312316  | -17.072191 |
| 47 | H | -13.033312 | 1.109552  | -15.322206 |
| 48 | C | -10.294884 | 0.539794  | -17.385688 |
| 49 | H | -10.889963 | 0.651938  | -18.297509 |
| 50 | H | -9.725792  | 1.465478  | -17.235542 |
| 51 | H | -9.593183  | -0.282818 | -17.539329 |
| 52 | C | -17.438608 | -1.183876 | -15.988771 |
| 53 | H | -17.943686 | -2.072620 | -16.380178 |
| 54 | H | -18.117679 | -0.330249 | -16.092597 |
| 55 | H | -16.544247 | -1.015967 | -16.593791 |
| 56 | C | -18.309508 | -1.780229 | -13.697032 |
| 57 | H | -18.986550 | -0.919931 | -13.630136 |
| 58 | H | -18.849930 | -2.599917 | -14.181029 |
| 59 | H | -18.046024 | -2.098613 | -12.686137 |
| 60 | C | -16.162736 | -0.278106 | -12.371173 |
| 61 | H | -15.353487 | 0.372300  | -12.025720 |
| 62 | H | -17.110262 | 0.110720  | -11.981927 |
| 63 | H | -15.997802 | -1.277630 | -11.957339 |
| 64 | C | -16.370745 | 1.093724  | -14.475457 |
| 65 | H | -17.389410 | 1.444064  | -14.269279 |
| 66 | H | -15.669783 | 1.792670  | -14.007942 |
| 67 | H | -16.201851 | 1.113829  | -15.553723 |
| 68 | H | -13.842928 | -3.061514 | -16.200790 |
| 69 | H | -11.795354 | -3.881995 | -15.097857 |
| 70 | C | -13.273335 | -4.877812 | -16.162182 |
| 71 | H | -12.964560 | -5.790262 | -15.696356 |
| 72 | H | -14.266464 | -4.990619 | -16.544110 |
| 73 | H | -12.606569 | -4.644169 | -16.965757 |

#### Cartesian coordinates of INT-2

| S.No. | Atoms | Coordinates (Angstroms) |           |            |
|-------|-------|-------------------------|-----------|------------|
|       |       | X                       | Y         | Z          |
| 1     | C     | -13.831763              | -5.735345 | -12.948223 |
| 2     | C     | -13.017301              | -4.882945 | -12.096864 |
| 3     | N     | -14.164436              | -5.342670 | -14.143750 |
| 4     | C     | -11.857193              | -2.852553 | -11.902006 |
| 5     | C     | -12.699030              | -5.233432 | -10.779179 |
| 6     | C     | -11.513641              | -3.148385 | -10.576774 |
| 7     | C     | -11.936098              | -4.352836 | -10.006756 |
| 8     | N     | -12.595845              | -3.703255 | -12.651405 |
| 9     | H     | -11.549815              | -1.943279 | -12.407175 |
| 10    | H     | -10.921676              | -2.439977 | -10.009520 |
| 11    | H     | -11.679589              | -4.602054 | -8.983331  |
| 12    | H     | -13.049638              | -6.175373 | -10.372165 |
| 13    | C     | -14.955859              | -6.211374 | -14.966652 |
| 14    | C     | -16.053139              | -5.670296 | -15.654425 |
| 15    | C     | -14.647120              | -7.578195 | -15.079285 |
| 16    | C     | -16.857401              | -6.513959 | -16.425847 |
| 17    | H     | -16.261340              | -4.610637 | -15.552573 |
| 18    | C     | -15.446810              | -8.406211 | -15.873298 |
| 19    | H     | -13.770035              | -7.978984 | -14.581118 |
| 20    | C     | -16.558411              | -7.878970 | -16.541060 |
| 21    | H     | -17.716982              | -6.102167 | -16.944686 |
| 22    | H     | -15.196750              | -9.457336 | -15.974397 |
| 23    | H     | -17.180286              | -8.523252 | -17.154089 |
| 24    | H     | -14.179483              | -6.687093 | -12.546259 |
| 25    | Ir    | -13.239966              | -3.375964 | -14.796810 |
| 26    | O     | -14.787851              | -0.762084 | -14.310824 |
| 27    | C     | -16.152342              | -0.306142 | -13.906078 |
| 28    | C     | -17.071112              | -1.431048 | -14.519613 |
| 29    | O     | -11.906373              | -1.032574 | -16.425577 |
| 30    | C     | -11.224111              | 0.275685  | -16.202036 |
| 31    | C     | -10.500682              | 0.034109  | -14.824496 |
| 32    | B     | -14.802314              | -2.162303 | -14.551346 |
| 33    | B     | -12.145524              | -1.684814 | -15.183014 |
| 34    | O     | -11.390167              | -0.980364 | -14.185459 |
| 35    | O     | -16.155113              | -2.615415 | -14.503959 |
| 36    | C     | -10.429543              | 1.250791  | -13.903310 |
| 37    | H     | -9.942002               | 0.973044  | -12.962729 |
| 38    | H     | -9.843283               | 2.055242  | -14.363828 |
| 39    | H     | -11.426078              | 1.630832  | -13.670718 |

|    |   |            |           |            |
|----|---|------------|-----------|------------|
| 40 | C | -9.120211  | -0.624470 | -14.965472 |
| 41 | H | -8.381396  | 0.071533  | -15.377987 |
| 42 | H | -8.776108  | -0.944203 | -13.976650 |
| 43 | H | -9.169857  | -1.505892 | -15.611748 |
| 44 | C | -12.335090 | 1.333398  | -16.132830 |
| 45 | H | -11.925432 | 2.340637  | -15.995774 |
| 46 | H | -12.896113 | 1.312316  | -17.072191 |
| 47 | H | -13.033312 | 1.109552  | -15.322206 |
| 48 | C | -10.294884 | 0.539794  | -17.385688 |
| 49 | H | -10.889963 | 0.651938  | -18.297509 |
| 50 | H | -9.725792  | 1.465478  | -17.235542 |
| 51 | H | -9.593183  | -0.282818 | -17.539329 |
| 52 | C | -17.438608 | -1.183876 | -15.988771 |
| 53 | H | -17.943686 | -2.072620 | -16.380178 |
| 54 | H | -18.117679 | -0.330249 | -16.092597 |
| 55 | H | -16.544247 | -1.015967 | -16.593791 |
| 56 | C | -18.309508 | -1.780229 | -13.697032 |
| 57 | H | -18.986550 | -0.919931 | -13.630136 |
| 58 | H | -18.849930 | -2.599917 | -14.181029 |
| 59 | H | -18.046024 | -2.098613 | -12.686137 |
| 60 | C | -16.162736 | -0.278106 | -12.371173 |
| 61 | H | -15.353487 | 0.372300  | -12.025720 |
| 62 | H | -17.110262 | 0.110720  | -11.981927 |
| 63 | H | -15.997802 | -1.277630 | -11.957339 |
| 64 | C | -16.370745 | 1.093724  | -14.475457 |
| 65 | H | -17.389410 | 1.444064  | -14.269279 |
| 66 | H | -15.669783 | 1.792670  | -14.007942 |
| 67 | H | -16.201851 | 1.113829  | -15.553723 |
| 68 | H | -13.842928 | -3.061514 | -16.200790 |
| 69 | H | -11.795354 | -3.881995 | -15.097857 |
| 70 | C | -13.273335 | -4.877812 | -16.162182 |
| 71 | H | -12.964560 | -5.790262 | -15.696356 |
| 72 | H | -14.266464 | -4.990619 | -16.544110 |
| 73 | H | -12.606569 | -4.644169 | -16.965757 |

### Cartesian coordinates of INT-3

| S.No. | Atoms | Coordinates (Angstroms) |           |            |
|-------|-------|-------------------------|-----------|------------|
|       |       | X                       | Y         | Z          |
| 1     | C     | -13.831763              | -5.735345 | -12.948223 |
| 2     | C     | -13.017301              | -4.882945 | -12.096864 |
| 3     | N     | -14.164436              | -5.342670 | -14.143750 |
| 4     | C     | -11.857193              | -2.852553 | -11.902006 |
| 5     | C     | -12.699030              | -5.233432 | -10.779179 |
| 6     | C     | -11.513641              | -3.148385 | -10.576774 |
| 7     | C     | -11.936098              | -4.352836 | -10.006756 |
| 8     | N     | -12.595845              | -3.703255 | -12.651405 |
| 9     | H     | -11.549815              | -1.943279 | -12.407175 |
| 10    | H     | -10.921676              | -2.439977 | -10.009520 |
| 11    | H     | -11.679589              | -4.602054 | -8.983331  |
| 12    | H     | -13.049638              | -6.175373 | -10.372165 |
| 13    | C     | -14.955859              | -6.211374 | -14.966652 |
| 14    | C     | -16.053139              | -5.670296 | -15.654425 |
| 15    | C     | -14.647120              | -7.578195 | -15.079285 |
| 16    | C     | -16.857401              | -6.513959 | -16.425847 |
| 17    | H     | -16.261340              | -4.610637 | -15.552573 |
| 18    | C     | -15.446810              | -8.406211 | -15.873298 |
| 19    | H     | -13.770035              | -7.978984 | -14.581118 |
| 20    | C     | -16.558411              | -7.878970 | -16.541060 |
| 21    | H     | -17.716982              | -6.102167 | -16.944686 |
| 22    | H     | -15.196750              | -9.457336 | -15.974397 |
| 23    | H     | -17.180286              | -8.523252 | -17.154089 |
| 24    | H     | -14.179483              | -6.687093 | -12.546259 |
| 25    | Ir    | -13.239966              | -3.375964 | -14.796810 |
| 26    | O     | -14.787851              | -0.762084 | -14.310824 |
| 27    | C     | -16.152342              | -0.306142 | -13.906078 |
| 28    | C     | -17.071112              | -1.431048 | -14.519613 |
| 29    | O     | -11.906373              | -1.032574 | -16.425577 |
| 30    | C     | -11.224111              | 0.275685  | -16.202036 |
| 31    | C     | -10.500682              | 0.034109  | -14.824496 |
| 32    | B     | -14.802314              | -2.162303 | -14.551346 |
| 33    | B     | -12.145524              | -1.684814 | -15.183014 |
| 34    | O     | -11.390167              | -0.980364 | -14.185459 |
| 35    | O     | -16.155113              | -2.615415 | -14.503959 |

|    |   |            |           |            |
|----|---|------------|-----------|------------|
| 36 | C | -10.429543 | 1.250791  | -13.903310 |
| 37 | H | -9.942002  | 0.973044  | -12.962729 |
| 38 | H | -9.843283  | 2.055242  | -14.363828 |
| 39 | H | -11.426078 | 1.630832  | -13.670718 |
| 40 | C | -9.120211  | -0.624470 | -14.965472 |
| 41 | H | -8.381396  | 0.071533  | -15.377987 |
| 42 | H | -8.776108  | -0.944203 | -13.976650 |
| 43 | H | -9.169857  | -1.505892 | -15.611748 |
| 44 | C | -12.335090 | 1.333398  | -16.132830 |
| 45 | H | -11.925432 | 2.340637  | -15.995774 |
| 46 | H | -12.896113 | 1.312316  | -17.072191 |
| 47 | H | -13.033312 | 1.109552  | -15.322206 |
| 48 | C | -10.294884 | 0.539794  | -17.385688 |
| 49 | H | -10.889963 | 0.651938  | -18.297509 |
| 50 | H | -9.725792  | 1.465478  | -17.235542 |
| 51 | H | -9.593183  | -0.282818 | -17.539329 |
| 52 | C | -17.438608 | -1.183876 | -15.988771 |
| 53 | H | -17.943686 | -2.072620 | -16.380178 |
| 54 | H | -18.117679 | -0.330249 | -16.092597 |
| 55 | H | -16.544247 | -1.015967 | -16.593791 |
| 56 | C | -18.309508 | -1.780229 | -13.697032 |
| 57 | H | -18.986550 | -0.919931 | -13.630136 |
| 58 | H | -18.849930 | -2.599917 | -14.181029 |
| 59 | H | -18.046024 | -2.098613 | -12.686137 |
| 60 | C | -16.162736 | -0.278106 | -12.371173 |
| 61 | H | -15.353487 | 0.372300  | -12.025720 |
| 62 | H | -17.110262 | 0.110720  | -11.981927 |
| 63 | H | -15.997802 | -1.277630 | -11.957339 |
| 64 | C | -16.370745 | 1.093724  | -14.475457 |
| 65 | H | -17.389410 | 1.444064  | -14.269279 |
| 66 | H | -15.669783 | 1.792670  | -14.007942 |
| 67 | H | -16.201851 | 1.113829  | -15.553723 |
| 68 | H | -13.842928 | -3.061514 | -16.200790 |
| 69 | C | -11.360118 | -4.034453 | -15.188557 |
| 70 | H | -11.113469 | -3.823310 | -16.208107 |
| 71 | H | -10.666316 | -3.537142 | -14.543406 |
| 72 | H | -11.309715 | -5.089993 | -15.020644 |
| 73 | H | -13.265609 | -4.530094 | -15.846061 |

### Cartesian coordinates of TS-2

| S.No. | Atoms | Coordinates (Angstroms) |           |            |
|-------|-------|-------------------------|-----------|------------|
|       |       | X                       | Y         | Z          |
| 1     | C     | -13.831763              | -5.735345 | -12.948223 |
| 2     | C     | -13.017301              | -4.882945 | -12.096864 |
| 3     | N     | -14.164436              | -5.342670 | -14.143750 |
| 4     | C     | -11.857193              | -2.852553 | -11.902006 |
| 5     | C     | -12.699030              | -5.233432 | -10.779179 |
| 6     | C     | -11.513641              | -3.148385 | -10.576774 |
| 7     | C     | -11.936098              | -4.352836 | -10.006756 |
| 8     | N     | -12.595845              | -3.703255 | -12.651405 |
| 9     | H     | -11.549815              | -1.943279 | -12.407175 |
| 10    | H     | -10.921676              | -2.439977 | -10.009520 |
| 11    | H     | -11.679589              | -4.602054 | -8.983331  |
| 12    | H     | -13.049638              | -6.175373 | -10.372165 |
| 13    | C     | -14.955859              | -6.211374 | -14.966652 |
| 14    | C     | -16.053139              | -5.670296 | -15.654425 |
| 15    | C     | -14.647120              | -7.578195 | -15.079285 |
| 16    | C     | -16.857401              | -6.513959 | -16.425847 |
| 17    | H     | -16.261340              | -4.610637 | -15.552573 |
| 18    | C     | -15.446810              | -8.406211 | -15.873298 |
| 19    | H     | -13.770035              | -7.978984 | -14.581118 |
| 20    | C     | -16.558411              | -7.878970 | -16.541060 |
| 21    | H     | -17.716982              | -6.102167 | -16.944686 |
| 22    | H     | -15.196750              | -9.457336 | -15.974397 |
| 23    | H     | -17.180286              | -8.523252 | -17.154089 |
| 24    | H     | -14.179483              | -6.687093 | -12.546259 |
| 25    | Ir    | -13.239966              | -3.375964 | -14.796810 |
| 26    | O     | -14.787851              | -0.762084 | -14.310824 |
| 27    | C     | -16.152342              | -0.306142 | -13.906078 |
| 28    | C     | -17.071112              | -1.431048 | -14.519613 |
| 29    | O     | -11.906373              | -1.032574 | -16.425577 |
| 30    | C     | -11.224111              | 0.275685  | -16.202036 |
| 31    | C     | -10.500682              | 0.034109  | -14.824496 |



|    |   |            |           |            |
|----|---|------------|-----------|------------|
| 32 | B | -14.802314 | -2.162303 | -14.551346 |
| 33 | B | -12.145524 | -1.684814 | -15.183014 |
| 34 | O | -11.390167 | -0.980364 | -14.185459 |
| 35 | O | -16.155113 | -2.615415 | -14.503959 |
| 36 | C | -10.429543 | 1.250791  | -13.903310 |
| 37 | H | -9.942002  | 0.973044  | -12.962729 |
| 38 | H | -9.843283  | 2.055242  | -14.363828 |
| 39 | H | -11.426078 | 1.630832  | -13.670718 |
| 40 | C | -9.120211  | -0.624470 | -14.965472 |
| 41 | H | -8.381396  | 0.071533  | -15.377987 |
| 42 | H | -8.776108  | -0.944203 | -13.976650 |
| 43 | H | -9.169857  | -1.505892 | -15.611748 |
| 44 | C | -12.335090 | 1.333398  | -16.132830 |
| 45 | H | -11.925432 | 2.340637  | -15.995774 |
| 46 | H | -12.896113 | 1.312316  | -17.072191 |
| 47 | H | -13.033312 | 1.109552  | -15.322206 |
| 48 | C | -10.294884 | 0.539794  | -17.385688 |
| 49 | H | -10.889963 | 0.651938  | -18.297509 |
| 50 | H | -9.725792  | 1.465478  | -17.235542 |
| 51 | H | -9.593183  | -0.282818 | -17.539329 |
| 52 | C | -17.438608 | -1.183876 | -15.988771 |
| 53 | H | -17.943686 | -2.072620 | -16.380178 |
| 54 | H | -18.117679 | -0.330249 | -16.092597 |
| 55 | H | -16.544247 | -1.015967 | -16.593791 |
| 56 | H | -18.309508 | -1.780229 | -13.697032 |
| 57 | H | -18.986550 | -0.919931 | -13.630136 |
| 58 | H | -18.849930 | -2.599917 | -14.181029 |
| 59 | H | -18.046024 | -2.098613 | -12.686137 |
| 60 | C | -16.162736 | -0.278106 | -12.371173 |
| 61 | H | -15.353487 | 0.372300  | -12.025720 |
| 62 | H | -17.110262 | 0.110720  | -11.981927 |
| 63 | H | -15.997802 | -1.277630 | -11.957339 |
| 64 | C | -16.370745 | 1.093724  | -14.475457 |
| 65 | H | -17.389410 | 1.444064  | -14.269279 |
| 66 | H | -15.669783 | 1.792670  | -14.007942 |
| 67 | H | -16.201851 | 1.113829  | -15.553723 |
| 68 | H | -13.842928 | -3.061514 | -16.200790 |
| 69 | C | -11.360118 | -4.034453 | -15.188557 |
| 70 | H | -11.113469 | -3.823310 | -16.208107 |
| 71 | H | -10.666316 | -3.537142 | -14.543406 |
| 72 | H | -11.309715 | -5.089993 | -15.020644 |
| 73 | H | -13.265609 | -4.530094 | -15.846061 |

#### Cartesian coordinates of INT-4

| S.No. | Atoms | Coordinates (Angstroms) |           |            |
|-------|-------|-------------------------|-----------|------------|
|       |       | X                       | Y         | Z          |
| 1     | C     | -14.458348              | -5.433514 | -13.016727 |
| 2     | C     | -13.565883              | -4.696650 | -12.136223 |
| 3     | N     | -14.687958              | -5.006695 | -14.224723 |
| 4     | C     | -12.142864              | -2.845781 | -11.900412 |
| 5     | C     | -13.349257              | -5.078849 | -10.806776 |
| 6     | C     | -11.893903              | -3.177315 | -10.562545 |
| 7     | C     | -12.500893              | -4.307451 | -10.007166 |
| 8     | N     | -12.963909              | -3.590790 | -12.676136 |
| 9     | H     | -11.693238              | -1.991523 | -12.394917 |
| 10    | H     | -11.230947              | -2.554101 | -9.974213  |
| 11    | H     | -12.320228              | -4.582815 | -8.974286  |
| 12    | H     | -13.842510              | -5.960130 | -10.411955 |
| 13    | C     | -15.560961              | -5.762706 | -15.075884 |
| 14    | C     | -16.545672              | -5.079221 | -15.805962 |
| 15    | C     | -15.441275              | -7.159905 | -15.174446 |
| 16    | C     | -17.429835              | -5.808297 | -16.606211 |
| 17    | H     | -16.608178              | -4.000238 | -15.713838 |
| 18    | C     | -16.317888              | -7.874278 | -15.997121 |
| 19    | H     | -14.647818              | -7.675190 | -14.642477 |
| 20    | C     | -17.319448              | -7.202367 | -16.707727 |
| 21    | H     | -18.203661              | -5.284692 | -17.158185 |
| 22    | H     | -16.212802              | -8.950619 | -16.086905 |
| 23    | H     | -18.001361              | -7.758241 | -17.343046 |
| 24    | H     | -14.949918              | -6.324942 | -12.626826 |
| 25    | Ir    | -13.475065              | -3.192012 | -14.845115 |
| 26    | O     | -14.661605              | -0.385181 | -14.422833 |
| 27    | C     | -15.963691              | 0.258648  | -14.071270 |

|    |   |            |           |            |
|----|---|------------|-----------|------------|
| 28 | C | -17.006218 | -0.731944 | -14.717675 |
| 29 | O | -10.698181 | 0.271425  | -15.666623 |
| 30 | C | -9.720792  | -0.245052 | -14.679494 |
| 31 | C | -10.385044 | -1.601807 | -14.235295 |
| 32 | B | -14.861581 | -1.771444 | -14.661491 |
| 33 | B | -11.982141 | -0.271840 | -15.444952 |
| 34 | O | -11.833248 | -1.324342 | -14.468585 |
| 35 | O | -16.265061 | -2.031924 | -14.665124 |
| 36 | C | -10.202464 | -1.965703 | -12.762813 |
| 37 | H | -10.726921 | -2.902630 | -12.546842 |
| 38 | H | -9.141448  | -2.109051 | -12.524875 |
| 39 | H | -10.607664 | -1.190602 | -12.109634 |
| 40 | C | -10.017853 | -2.787849 | -15.139605 |
| 41 | H | -8.977945  | -3.100161 | -14.993012 |
| 42 | H | -10.668076 | -3.634514 | -14.897175 |
| 43 | H | -10.162542 | -2.536710 | -16.194609 |
| 44 | C | -9.671206  | 0.806958  | -13.562070 |
| 45 | H | -8.952847  | 0.532692  | -12.781127 |
| 46 | H | -9.362938  | 1.763036  | -13.996205 |
| 47 | H | -10.659644 | 0.946099  | -13.116689 |
| 48 | C | -8.359269  | -0.380845 | -15.359246 |
| 49 | H | -8.005003  | 0.608609  | -15.665172 |
| 50 | H | -7.620398  | -0.808042 | -14.670137 |
| 51 | H | -8.413858  | -1.010368 | -16.249977 |
| 52 | C | -17.280225 | -0.446265 | -16.200199 |
| 53 | H | -17.888894 | -1.258918 | -16.609204 |
| 54 | H | -17.829599 | 0.492673  | -16.331271 |
| 55 | H | -16.349077 | -0.408386 | -16.770859 |
| 56 | C | -18.311207 | -0.900046 | -13.942472 |
| 57 | H | -18.864071 | 0.046393  | -13.902882 |
| 58 | H | -18.941765 | -1.640044 | -14.445461 |
| 59 | H | -18.132787 | -1.244960 | -12.921737 |
| 60 | C | -16.027835 | 0.298444  | -12.537930 |
| 61 | H | -15.149583 | 0.832510  | -12.162838 |
| 62 | H | -16.926055 | 0.817787  | -12.185809 |
| 63 | H | -16.019189 | -0.711421 | -12.116495 |
| 64 | C | -15.963724 | 1.671319  | -14.650819 |
| 65 | H | -16.930803 | 2.161168  | -14.484291 |
| 66 | H | -15.190470 | 2.269336  | -14.157971 |
| 67 | H | -15.753220 | 1.660331  | -15.721872 |
| 68 | H | -14.079809 | -3.310725 | -16.278221 |
| 69 | H | -12.222099 | -4.024223 | -15.258759 |
| 70 | C | -13.387356 | 0.206020  | -16.165729 |
| 71 | H | -13.778136 | -0.598162 | -16.753506 |
| 72 | H | -14.099247 | 0.477377  | -15.414413 |
| 73 | H | -13.195944 | 1.048731  | -16.796681 |

#### Cartesian coordinates of INT-5

| S.No. | Atoms | Coordinates (Angstroms) |           |            |
|-------|-------|-------------------------|-----------|------------|
|       |       | X                       | Y         | Z          |
| 1     | C     | -13.497862              | -5.738790 | -13.700062 |
| 2     | c     | -13.071552              | -4.790677 | -12.691467 |
| 3     | N     | -13.442749              | -5.413773 | -14.960612 |
| 4     | C     | -12.175296              | -2.661794 | -12.262139 |
| 5     | C     | -13.037370              | -5.114050 | -11.327317 |
| 6     | C     | -12.108432              | -2.937915 | -10.893759 |
| 7     | C     | -12.554144              | -4.176149 | -10.414673 |
| 8     | N     | -12.661418              | -3.564760 | -13.147279 |
| 9     | H     | -11.830114              | -1.728579 | -12.692699 |
| 10    | H     | -11.710830              | -2.188918 | -10.218926 |
| 11    | H     | -12.515491              | -4.407389 | -9.356140  |
| 12    | H     | -13.375784              | -6.091202 | -11.000841 |
| 13    | C     | -13.769162              | -6.375170 | -15.968529 |
| 14    | C     | -14.370898              | -5.926884 | -17.155588 |
| 15    | C     | -13.480543              | -7.743663 | -15.806458 |
| 16    | C     | -14.718981              | -6.843474 | -18.150172 |
| 17    | H     | -14.544693              | -4.866045 | -17.283624 |
| 18    | C     | -13.819504              | -8.652002 | -16.812978 |
| 19    | H     | -12.958233              | -8.089098 | -14.920739 |
| 20    | C     | -14.447729              | -8.207955 | -17.983133 |
| 21    | H     | -15.190373              | -6.489818 | -19.061059 |
| 22    | H     | -13.580771              | -9.703270 | -16.688071 |
| 23    | H     | -14.706721              | -8.915279 | -18.764115 |

|    |    |            |           |            |    |    |            |           |            |
|----|----|------------|-----------|------------|----|----|------------|-----------|------------|
| 24 | H  | -13.851108 | -6.715916 | -13.373399 | 3  | N  | -12.966147 | -5.333184 | -14.083204 |
| 25 | Ir | -12.733932 | -3.305017 | -15.311165 | 4  | C  | -11.360636 | -2.282873 | -11.922785 |
| 26 | O  | -15.351845 | -1.070858 | -14.535231 | 5  | c  | -11.527280 | -4.780300 | -10.750988 |
| 27 | C  | -16.311206 | -0.975284 | -13.374861 | 6  | C  | -10.929979 | -2.453444 | -10.600959 |
| 28 | C  | -16.928156 | -2.432694 | -13.332297 | 7  | C  | -11.010954 | -3.715918 | -10.006238 |
| 29 | O  | -12.034610 | -1.891473 | -15.917082 | 8  | N  | -11.861047 | -3.311607 | -12.645417 |
| 30 | C  | -12.744304 | -0.581167 | -15.959185 | 9  | H  | -11.311848 | -1.334212 | -12.446345 |
| 31 | C  | -11.617403 | 0.391549  | -16.480065 | 10 | H  | -10.536499 | -1.603917 | -10.055506 |
| 32 | B  | -15.048880 | -2.410925 | -14.754791 | 11 | H  | -10.681397 | -3.869983 | -8.984984  |
| 33 | B  | -10.631559 | -1.695530 | -15.818761 | 12 | H  | -11.610740 | -5.773654 | -10.324231 |
| 34 | O  | -10.374928 | -0.294349 | -16.013066 | 13 | C  | -13.513899 | -6.394520 | -14.877998 |
| 35 | O  | -15.844894 | -3.258980 | -13.982295 | 14 | C  | -14.725897 | -6.174015 | -15.550502 |
| 36 | C  | -11.639712 | 1.795753  | -15.878080 | 15 | C  | -12.857831 | -7.633750 | -14.978438 |
| 37 | H  | -10.793935 | 2.374062  | -16.264983 | 16 | C  | -15.291800 | -7.213629 | -16.293907 |
| 38 | H  | -12.562882 | 2.322314  | -16.149124 | 17 | H  | -15.204244 | -5.204808 | -15.458742 |
| 39 | H  | -11.562347 | 1.764845  | -14.789028 | 18 | H  | -13.423811 | -8.657484 | -15.744733 |
| 40 | C  | -11.525882 | 0.457116  | -18.011452 | 19 | H  | -11.898234 | -7.780369 | -14.492890 |
| 41 | H  | -12.389270 | 0.973873  | -18.445342 | 20 | C  | -14.645654 | -8.453726 | -16.396752 |
| 42 | H  | -10.621350 | 1.009178  | -18.287558 | 21 | H  | -16.237745 | -7.052171 | -16.800627 |
| 43 | H  | -11.457218 | -0.546168 | -18.440731 | 22 | H  | -12.907326 | -9.607430 | -15.836708 |
| 44 | C  | -13.198197 | -0.285327 | -14.522162 | 23 | H  | -15.085614 | -9.250113 | -16.988222 |
| 45 | H  | -13.761163 | 0.653165  | -14.461716 | 24 | H  | -12.600732 | -6.604561 | -12.467734 |
| 46 | H  | -13.846692 | -1.100127 | -14.185999 | 25 | Ir | -12.603117 | -3.204874 | -14.781468 |
| 47 | H  | -12.344613 | -0.239749 | -13.840706 | 26 | O  | -14.776914 | -1.081981 | -14.299362 |
| 48 | C  | -13.950989 | -0.729766 | -16.885138 | 27 | C  | -16.206617 | -0.993820 | -13.873077 |
| 49 | H  | -14.647707 | -1.458336 | -16.458700 | 28 | C  | -16.806329 | -2.331944 | -14.452511 |
| 50 | H  | -14.479936 | 0.224999  | -16.996286 | 29 | O  | -12.046211 | -0.380427 | -16.015661 |
| 51 | H  | -13.653926 | -1.086511 | -17.873263 | 30 | C  | -12.004813 | 1.097433  | -15.912329 |
| 52 | C  | -18.166806 | -2.604581 | -14.219383 | 31 | C  | -11.090214 | 1.315044  | -14.649207 |
| 53 | H  | -18.410666 | -3.668721 | -14.285636 | 32 | B  | -14.425848 | -2.440831 | -14.520613 |
| 54 | H  | -19.030761 | -2.076928 | -13.801964 | 33 | B  | -11.777256 | -0.986335 | -14.769320 |
| 55 | H  | -17.986884 | -2.233090 | -15.232409 | 34 | O  | -11.326001 | 0.057318  | -13.880288 |
| 56 | C  | -17.170919 | -2.998997 | -11.936405 | 35 | O  | -15.610536 | -3.233019 | -14.439545 |
| 57 | H  | -17.916047 | -2.399681 | -11.400690 | 36 | C  | -11.477305 | 2.495142  | -13.759551 |
| 58 | H  | -17.553068 | -4.020856 | -12.020091 | 37 | H  | -10.806396 | 2.540743  | -12.895068 |
| 59 | H  | -16.252388 | -3.026506 | -11.347161 | 38 | H  | -11.389358 | 3.441663  | -14.306617 |
| 60 | C  | -15.464824 | -0.623509 | -12.146958 | 39 | H  | -12.500162 | 2.395490  | -13.391524 |
| 61 | H  | -14.927367 | 0.308640  | -12.342909 | 40 | C  | -9.590282  | 1.349349  | -14.978339 |
| 62 | H  | -16.093848 | -0.480439 | -11.261874 | 41 | H  | -9.312390  | 2.272742  | -15.498490 |
| 63 | H  | -14.726641 | -1.399994 | -11.931258 | 42 | H  | -9.020180  | 1.295933  | -14.045314 |
| 64 | C  | -17.301082 | 0.142781  | -13.691988 | 43 | H  | -9.305633  | 0.496856  | -15.602256 |
| 65 | H  | -18.057629 | 0.224378  | -12.902900 | 44 | C  | -13.460859 | 1.534645  | -15.696470 |
| 66 | H  | -16.765640 | 1.094831  | -13.751169 | 45 | H  | -13.549086 | 2.624964  | -15.628969 |
| 67 | H  | -17.804028 | -0.021439 | -14.646527 | 46 | H  | -14.058275 | 1.190573  | -16.546351 |
| 68 | H  | -12.651674 | -3.288862 | -16.909697 | 47 | H  | -13.872622 | 1.078145  | -14.792704 |
| 69 | C  | -7.510157  | -4.366276 | -15.616292 | 48 | C  | -11.453961 | 1.667200  | -17.218536 |
| 70 | C  | -7.409756  | -3.621168 | -14.232885 | 49 | H  | -12.139446 | 1.427836  | -18.037639 |
| 71 | B  | -9.199940  | -2.683146 | -15.495037 | 50 | H  | -11.362852 | 2.758788  | -17.159922 |
| 72 | C  | -6.194118  | -4.515343 | -16.376020 | 51 | H  | -10.476339 | 1.245791  | -17.462155 |
| 73 | H  | -5.485228  | -5.131706 | -15.809876 | 52 | C  | -17.249581 | -2.217259 | -15.917074 |
| 74 | H  | -6.379277  | -5.006432 | -17.336945 | 53 | H  | -17.508912 | -3.214635 | -16.286070 |
| 75 | H  | -5.734084  | -3.544944 | -16.574149 | 54 | H  | -18.131134 | -1.574481 | -16.018550 |
| 76 | C  | -8.248460  | -5.709508 | -15.532082 | 55 | H  | -16.440920 | -1.831069 | -16.542413 |
| 77 | H  | -8.454985  | -6.063620 | -16.546899 | 56 | C  | -17.895564 | -2.979519 | -13.600215 |
| 78 | H  | -7.648303  | -6.467744 | -15.016786 | 57 | H  | -18.774166 | -2.326633 | -13.531152 |
| 79 | H  | -9.202839  | -5.598345 | -15.009096 | 58 | H  | -18.208669 | -3.921290 | -14.061984 |
| 80 | C  | -6.314086  | -2.546201 | -14.196380 | 59 | H  | -17.541258 | -3.198694 | -12.590695 |
| 81 | H  | -6.449390  | -1.937444 | -13.297637 | 60 | C  | -16.199298 | -0.941281 | -12.338797 |
| 82 | H  | -5.313270  | -2.991654 | -14.167797 | 61 | H  | -15.584534 | -0.094601 | -12.018726 |
| 83 | H  | -6.380682  | -1.885416 | -15.065773 | 62 | H  | -17.209389 | -0.808416 | -11.935601 |
| 84 | C  | -7.318114  | -4.527392 | -13.007029 | 63 | H  | -15.770219 | -1.854385 | -11.914954 |
| 85 | H  | -6.399737  | -5.126601 | -13.033508 | 64 | C  | -16.795246 | 0.288513  | -14.456732 |
| 86 | H  | -7.298884  | -3.913823 | -12.100967 | 65 | H  | -17.866763 | 0.362167  | -14.234580 |
| 87 | H  | -8.175289  | -5.200438 | -12.940905 | 66 | H  | -16.295749 | 1.155762  | -14.013083 |
| 88 | O  | -8.396574  | -3.446097 | -16.395660 | 67 | H  | -16.655010 | 0.332519  | -15.538390 |
| 89 | O  | -8.715372  | -2.895548 | -14.177686 | 68 | H  | -13.187458 | -3.590669 | -16.175494 |
| 90 | H  | -14.462252 | -2.770441 | -15.782506 | 69 | C  | -8.645615  | -5.784252 | -15.788109 |
|    |    |            |           |            | 70 | C  | -8.177031  | -4.358481 | -16.041135 |
|    |    |            |           |            | 71 | B  | -10.377861 | -4.253944 | -14.941702 |
|    |    |            |           |            | 72 | C  | -8.661629  | -6.590074 | -17.100357 |
|    |    |            |           |            | 73 | H  | -7.658640  | -6.727365 | -17.446859 |
|    |    |            |           |            | 74 | H  | -9.112982  | -7.544647 | -16.927236 |
|    |    |            |           |            | 75 | H  | -9.224393  | -6.058098 | -17.838733 |
|    |    |            |           |            | 76 | C  | -7.679467  | -6.502390 | -14.827674 |
|    |    |            |           |            | 77 | H  | -7.986497  | -7.520397 | -14.708111 |

### Cartesian coordinates of TS-3

| S.No. | Atoms | Coordinates (Angstroms) |           |            |
|-------|-------|-------------------------|-----------|------------|
|       |       | X                       | Y         | Z          |
| 1     | C     | -12.522559              | -5.602415 | -12.889516 |
| 2     | c     | -11.947830              | -4.550219 | -12.066522 |

|    |   |            |           |            |
|----|---|------------|-----------|------------|
| 78 | H | -6.688766  | -6.473658 | -15.230891 |
| 79 | H | -7.691856  | -6.012081 | -13.876704 |
| 80 | C | -7.976456  | -4.119370 | -17.549179 |
| 81 | H | -7.882224  | -3.069752 | -17.734446 |
| 82 | H | -7.088671  | -4.620127 | -17.874723 |
| 83 | H | -8.819112  | -4.502094 | -18.086164 |
| 84 | C | -6.819720  | -4.107475 | -15.358272 |
| 85 | H | -6.099057  | -4.805756 | -15.729685 |
| 86 | H | -6.492798  | -3.110895 | -15.570052 |
| 87 | H | -6.924239  | -4.231373 | -14.300621 |
| 88 | O | -10.040583 | -5.718154 | -15.183332 |
| 89 | O | -9.234811  | -3.412279 | -15.491232 |
| 90 | H | -14.142626 | -3.469191 | -14.919255 |

#### Cartesian coordinates of INT-6

| S.No. | Atoms | Coordinates (Angstroms) |           |            |
|-------|-------|-------------------------|-----------|------------|
|       |       | X                       | Y         | Z          |
| 1     | C     | -12.522559              | -5.602415 | -12.889516 |
| 2     | c     | -11.947830              | -4.550219 | -12.066522 |
| 3     | N     | -12.966147              | -5.333184 | -14.083204 |
| 4     | C     | -11.360636              | -2.282873 | -11.922785 |
| 5     | c     | -11.527280              | -4.780300 | -10.750988 |
| 6     | C     | -10.929979              | -2.453444 | -10.600959 |
| 7     | C     | -11.010954              | -3.715918 | -10.006238 |
| 8     | N     | -11.861047              | -3.311607 | -12.645417 |
| 9     | H     | -11.311848              | -1.334212 | -12.446345 |
| 10    | H     | -10.536499              | -1.603917 | -10.055506 |
| 11    | H     | -10.681397              | -3.869983 | -8.984984  |
| 12    | H     | -11.610740              | -5.773654 | -10.324231 |
| 13    | C     | -13.513899              | -6.394520 | -14.877998 |
| 14    | C     | -14.725897              | -6.174015 | -15.550502 |
| 15    | C     | -12.857831              | -7.633750 | -14.978438 |
| 16    | C     | -15.291800              | -7.213629 | -16.293907 |
| 17    | H     | -15.204244              | -5.204808 | -15.458742 |
| 18    | H     | -13.423811              | -8.657484 | -15.744733 |
| 19    | H     | -11.898234              | -7.780369 | -14.492890 |
| 20    | C     | -14.645654              | -8.453726 | -16.396752 |
| 21    | H     | -16.237745              | -7.052171 | -16.800627 |
| 22    | H     | -12.907326              | -9.607430 | -15.836708 |
| 23    | H     | -15.085614              | -9.250113 | -16.988222 |
| 24    | H     | -12.600732              | -6.604561 | -12.467734 |
| 25    | Ir    | -12.603117              | -3.204874 | -14.781468 |
| 26    | O     | -14.776914              | -1.081981 | -14.299362 |
| 27    | C     | -16.206617              | -0.993820 | -13.873077 |
| 28    | C     | -16.806329              | -2.331944 | -14.452511 |
| 29    | O     | -12.046211              | -0.380427 | -16.015661 |
| 30    | C     | -12.004813              | 1.097433  | -15.912329 |
| 31    | C     | -11.090214              | 1.315044  | -14.649207 |
| 32    | B     | -14.425848              | -2.440831 | -14.520613 |
| 33    | B     | -11.777256              | -0.986335 | -14.769320 |
| 34    | O     | -11.326001              | 0.057318  | -13.880288 |
| 35    | O     | -15.610536              | -3.233019 | -14.439545 |
| 36    | C     | -11.477305              | 2.495142  | -13.759551 |
| 37    | H     | -10.806396              | 2.540743  | -12.895068 |
| 38    | H     | -11.389358              | 3.441663  | -14.306617 |
| 39    | H     | -12.500162              | 2.395490  | -13.391524 |
| 40    | C     | -9.590282               | 1.349349  | -14.978339 |
| 41    | H     | -9.312390               | 2.272742  | -15.498490 |
| 42    | H     | -9.020180               | 1.295933  | -14.045314 |
| 43    | H     | -9.305633               | 0.496856  | -15.602256 |
| 44    | C     | -13.460859              | 1.534645  | -15.696470 |
| 45    | H     | -13.549086              | 2.624964  | -15.628969 |
| 46    | H     | -14.058275              | 1.190573  | -16.546351 |
| 47    | H     | -13.872622              | 1.078145  | -14.792704 |
| 48    | C     | -11.453961              | 1.667200  | -17.218536 |
| 49    | H     | -12.139446              | 1.427836  | -18.037639 |
| 50    | H     | -11.362852              | 2.758788  | -17.159922 |
| 51    | H     | -10.476339              | 1.245791  | -17.462155 |
| 52    | C     | -17.249581              | -2.217259 | -15.917074 |
| 53    | H     | -17.508912              | -3.214635 | -16.286070 |
| 54    | H     | -18.131134              | -1.574481 | -16.018550 |
| 55    | H     | -16.440920              | -1.831069 | -16.542413 |
| 56    | C     | -17.895564              | -2.979519 | -13.600215 |

|    |   |            |           |            |
|----|---|------------|-----------|------------|
| 57 | H | -18.774166 | -2.326633 | -13.531152 |
| 58 | H | -18.208669 | -3.921290 | -14.061984 |
| 59 | H | -17.541258 | -3.198694 | -12.590695 |
| 60 | C | -16.199298 | -0.941281 | -12.338797 |
| 61 | H | -15.584534 | -0.094601 | -12.018726 |
| 62 | H | -17.209389 | -0.808416 | -11.935601 |
| 63 | H | -15.770219 | -1.854385 | -11.914954 |
| 64 | C | -16.795246 | 0.288513  | -14.456732 |
| 65 | H | -17.866763 | 0.362167  | -14.234580 |
| 66 | H | -16.295749 | 1.155762  | -14.013083 |
| 67 | H | -16.655010 | 0.332519  | -15.538390 |
| 68 | H | -13.187458 | -3.590669 | -16.175494 |
| 69 | C | -8.645615  | -5.784252 | -15.788109 |
| 70 | C | -8.177031  | -4.358481 | -16.041135 |
| 71 | B | -10.377861 | -4.253944 | -14.941702 |
| 72 | C | -8.661629  | -6.590074 | -17.100357 |
| 73 | H | -7.658640  | -6.727365 | -17.446859 |
| 74 | H | -9.112982  | -7.544647 | -16.927236 |
| 75 | H | -9.224393  | -6.058098 | -17.838733 |
| 76 | C | -7.679467  | -6.502390 | -14.827674 |
| 77 | H | -7.986497  | -7.520397 | -14.708111 |
| 78 | H | -6.688766  | -6.473658 | -15.230891 |
| 79 | H | -7.691856  | -6.012081 | -13.876704 |
| 80 | C | -7.976456  | -4.119370 | -17.549179 |
| 81 | H | -7.882224  | -3.069752 | -17.734446 |
| 82 | H | -7.088671  | -4.620127 | -17.874723 |
| 83 | H | -8.819112  | -4.502094 | -18.086164 |
| 84 | C | -6.819720  | -4.107475 | -15.358272 |
| 85 | H | -6.099057  | -4.805756 | -15.729685 |
| 86 | H | -6.492798  | -3.110895 | -15.570052 |
| 87 | H | -6.924239  | -4.231373 | -14.300621 |
| 88 | O | -10.040583 | -5.718154 | -15.183332 |
| 89 | O | -9.234811  | -3.412279 | -15.491232 |
| 90 | H | -14.142626 | -3.469191 | -14.919255 |

#### Cartesian coordinates of TS-4

| S.No. | Atoms | Coordinates (Angstroms) |           |            |
|-------|-------|-------------------------|-----------|------------|
|       |       | X                       | Y         | Z          |
| 1     | C     | -12.522559              | -5.602415 | -12.889516 |
| 2     | C     | -11.947830              | -4.550219 | -12.066522 |
| 3     | N     | -12.966147              | -5.333184 | -14.083204 |
| 4     | C     | -11.360636              | -2.282873 | -11.922785 |
| 5     | C     | -11.527280              | -4.780300 | -10.750988 |
| 6     | C     | -10.929979              | -2.453444 | -10.600959 |
| 7     | C     | -11.010954              | -3.715918 | -10.006238 |
| 8     | N     | -11.861047              | -3.311607 | -12.645417 |
| 9     | H     | -11.311848              | -1.334212 | -12.446345 |
| 10    | H     | -10.536499              | -1.603917 | -10.055506 |
| 11    | H     | -10.681397              | -3.869983 | -8.984984  |
| 12    | H     | -11.610740              | -5.773654 | -10.324231 |
| 13    | C     | -13.513899              | -6.394520 | -14.877998 |
| 14    | C     | -14.725897              | -6.174015 | -15.550502 |
| 15    | C     | -12.857831              | -7.633750 | -14.978438 |
| 16    | C     | -15.291800              | -7.213629 | -16.293907 |
| 17    | H     | -15.204244              | -5.204808 | -15.458742 |
| 18    | C     | -13.423811              | -8.657484 | -15.744733 |
| 19    | H     | -11.898234              | -7.780369 | -14.492890 |
| 20    | C     | -14.645654              | -8.453726 | -16.396752 |
| 21    | H     | -16.237745              | -7.052171 | -16.800627 |
| 22    | H     | -12.907326              | -9.607430 | -15.836708 |
| 23    | H     | -15.085614              | -9.250113 | -16.988222 |
| 24    | H     | -12.600732              | -6.604561 | -12.467734 |
| 25    | Ir    | -12.603117              | -3.204874 | -14.781468 |
| 26    | O     | -14.776914              | -1.081981 | -14.299362 |
| 27    | C     | -16.206617              | -0.993820 | -13.873077 |
| 28    | C     | -16.806329              | -2.331944 | -14.452511 |
| 29    | O     | -12.046211              | -0.380427 | -16.015661 |
| 30    | C     | -12.004813              | 1.097433  | -15.912329 |
| 31    | C     | -11.090214              | 1.315044  | -14.649207 |
| 32    | B     | -14.425848              | -2.440831 | -14.520613 |
| 33    | B     | -11.777256              | -0.986335 | -14.769320 |
| 34    | O     | -11.326001              | 0.057318  | -13.880288 |
| 35    | O     | -15.610536              | -3.233019 | -14.439545 |

|    |   |            |           |            |    |   |            |           |            |
|----|---|------------|-----------|------------|----|---|------------|-----------|------------|
| 36 | C | -11.477305 | 2.495142  | -13.759551 | 64 | C | -16.795246 | 0.288513  | -14.456732 |
| 37 | H | -10.806396 | 2.540743  | -12.895068 | 65 | H | -17.866763 | 0.362167  | -14.234580 |
| 38 | H | -11.389358 | 3.441663  | -14.306617 | 66 | H | -16.295749 | 1.155762  | -14.013083 |
| 39 | H | -12.500162 | 2.395490  | -13.391524 | 67 | H | -16.655010 | 0.332519  | -15.538390 |
| 40 | C | -9.590282  | 1.349349  | -14.978339 | 68 | H | -13.187458 | -3.590669 | -16.175494 |
| 41 | H | -9.312390  | 2.272742  | -15.498490 | 69 | C | -8.645615  | -5.784252 | -15.788109 |
| 42 | H | -9.020180  | 1.295933  | -14.045314 | 70 | C | -8.177031  | -4.358481 | -16.041135 |
| 43 | H | -9.305633  | 0.496856  | -15.602256 | 71 | B | -10.377861 | -4.253944 | -14.941702 |
| 44 | C | -13.460859 | 1.534645  | -15.696470 | 72 | C | -8.661629  | -6.590074 | -17.100357 |
| 45 | H | -13.549086 | 2.624964  | -15.628969 | 73 | H | -7.658640  | -6.727365 | -17.446859 |
| 46 | H | -14.058275 | 1.190573  | -16.546351 | 74 | H | -9.112982  | -7.544647 | -16.927236 |
| 47 | H | -13.872622 | 1.078145  | -14.792704 | 75 | H | -9.224393  | -6.058098 | -17.838733 |
| 48 | C | -11.453961 | 1.667200  | -17.218536 | 76 | C | -7.679467  | -6.502390 | -14.827674 |
| 49 | H | -12.139446 | 1.427836  | -18.037639 | 77 | H | -7.986497  | -7.520397 | -14.708111 |
| 50 | H | -11.362852 | 2.758788  | -17.159922 | 78 | H | -6.688766  | -6.473658 | -15.230891 |
| 51 | H | -10.476339 | 1.245791  | -17.462155 | 79 | H | -7.691856  | -6.012081 | -13.876704 |
| 52 | C | -17.249581 | -2.217259 | -15.917074 | 80 | C | -7.976456  | -4.119370 | -17.549179 |
| 53 | H | -17.508912 | -3.214635 | -16.286070 | 81 | H | -7.882224  | -3.069752 | -17.734446 |
| 54 | H | -18.131134 | -1.574481 | -16.018550 | 82 | H | -7.088671  | -4.620127 | -17.874723 |
| 55 | H | -16.440920 | -1.831069 | -16.542413 | 83 | H | -8.819112  | -4.502094 | -18.086164 |
| 56 | C | -17.895564 | -2.979519 | -13.600215 | 84 | C | -6.819720  | -4.107475 | -15.358272 |
| 57 | H | -18.774166 | -2.326633 | -13.531152 | 85 | H | -6.099057  | -4.805756 | -15.729685 |
| 58 | H | -18.208669 | -3.921290 | -14.061984 | 86 | H | -6.492798  | -3.110895 | -15.570052 |
| 59 | H | -17.541258 | -3.198694 | -12.590695 | 87 | H | -6.924239  | -4.231373 | -14.300621 |
| 60 | C | -16.199298 | -0.941281 | -12.338797 | 88 | C | -10.040583 | -5.718154 | -15.183332 |
| 61 | H | -15.584534 | -0.094601 | -12.018726 | 89 | O | -9.234811  | -3.412279 | -15.491232 |
| 62 | H | -17.209389 | -0.808416 | -11.935601 | 90 | H | -14.142626 | -3.469191 | -14.919255 |
| 63 | H | -15.770219 | -1.854385 | -11.914954 |    |   |            |           |            |

## 6.2. Ir<sup>I</sup>-Ir<sup>III</sup>-Ir<sup>I</sup> catalytic cycle of pyrim-UiO-IrH catalyzed monoborylation of methane.

In pyrim-UiO-IrH catalyzed monoborylation of methane, a Ir<sup>I</sup>-Ir<sup>III</sup>-Ir<sup>I</sup> catalytic cycle (Figure S17, SI) could be an alternative pathway compared to the Ir<sup>III</sup>-Ir<sup>V</sup>-Ir<sup>III</sup> catalytic cycle as described in Figure 4 in the main manuscript. According to this cycle, Ir<sup>III</sup>(diboryl)hydride (INT-A) undergoes reductive elimination of a B–H bond, resulting in the formation of the Ir<sup>I</sup> boryl intermediate (INT-B), instead of oxidative addition to form a 7 coordinate, 18-electron Ir<sup>V</sup> intermediate (INT-2, Figure 4, manuscript). Subsequent oxidative addition of methane yields Ir<sup>III</sup>(boryl)(methyl)hydride (INT-C), and further reductive elimination of MeBpin and oxidative addition of B<sub>2</sub>pin<sub>2</sub> regenerates INT-A. Alternatively, pyrim-Ir<sup>I</sup>(Bpin) (INT B) reacts with CH<sub>4</sub> to form pyrim-Ir<sup>III</sup>(Bpin)(CH<sub>3</sub>)(H) (INT-C), which could undergo reductive elimination to give pyrim-Ir<sup>I</sup>-CH<sub>3</sub> species. Then, pyrim-Ir<sup>I</sup>-CH<sub>3</sub> reacts with B<sub>2</sub>Pin<sub>2</sub> to give pyrim-Ir<sup>III</sup>(CH<sub>3</sub>)(Bpin)<sub>2</sub>, which then gives CH<sub>3</sub>Bpin and regenerates INT-B. However, these above two pathways via Ir<sup>I</sup>-Ir<sup>III</sup>-Ir<sup>I</sup> catalytic cycle are unlikely due to the high barrier associated with the transformation of INT-B to INT-C, involving CH<sub>4</sub> C–H activation. DFT calculations reveal that the activation energy for methane mono borylation via Ir<sup>I</sup>-Ir<sup>III</sup>-Ir<sup>I</sup> cycle is significantly higher compared to that of Ir<sup>III</sup>-Ir<sup>V</sup>-Ir<sup>III</sup> catalytic cycle, as depicted in Figure 4 of the manuscript. Therefore, based on the DFT calculation, we propose that pyrim-UiO-IrH catalyzed methane borylation reaction likely occurs via Ir<sup>III</sup>-Ir<sup>V</sup>-Ir<sup>III</sup> catalytic cycle.

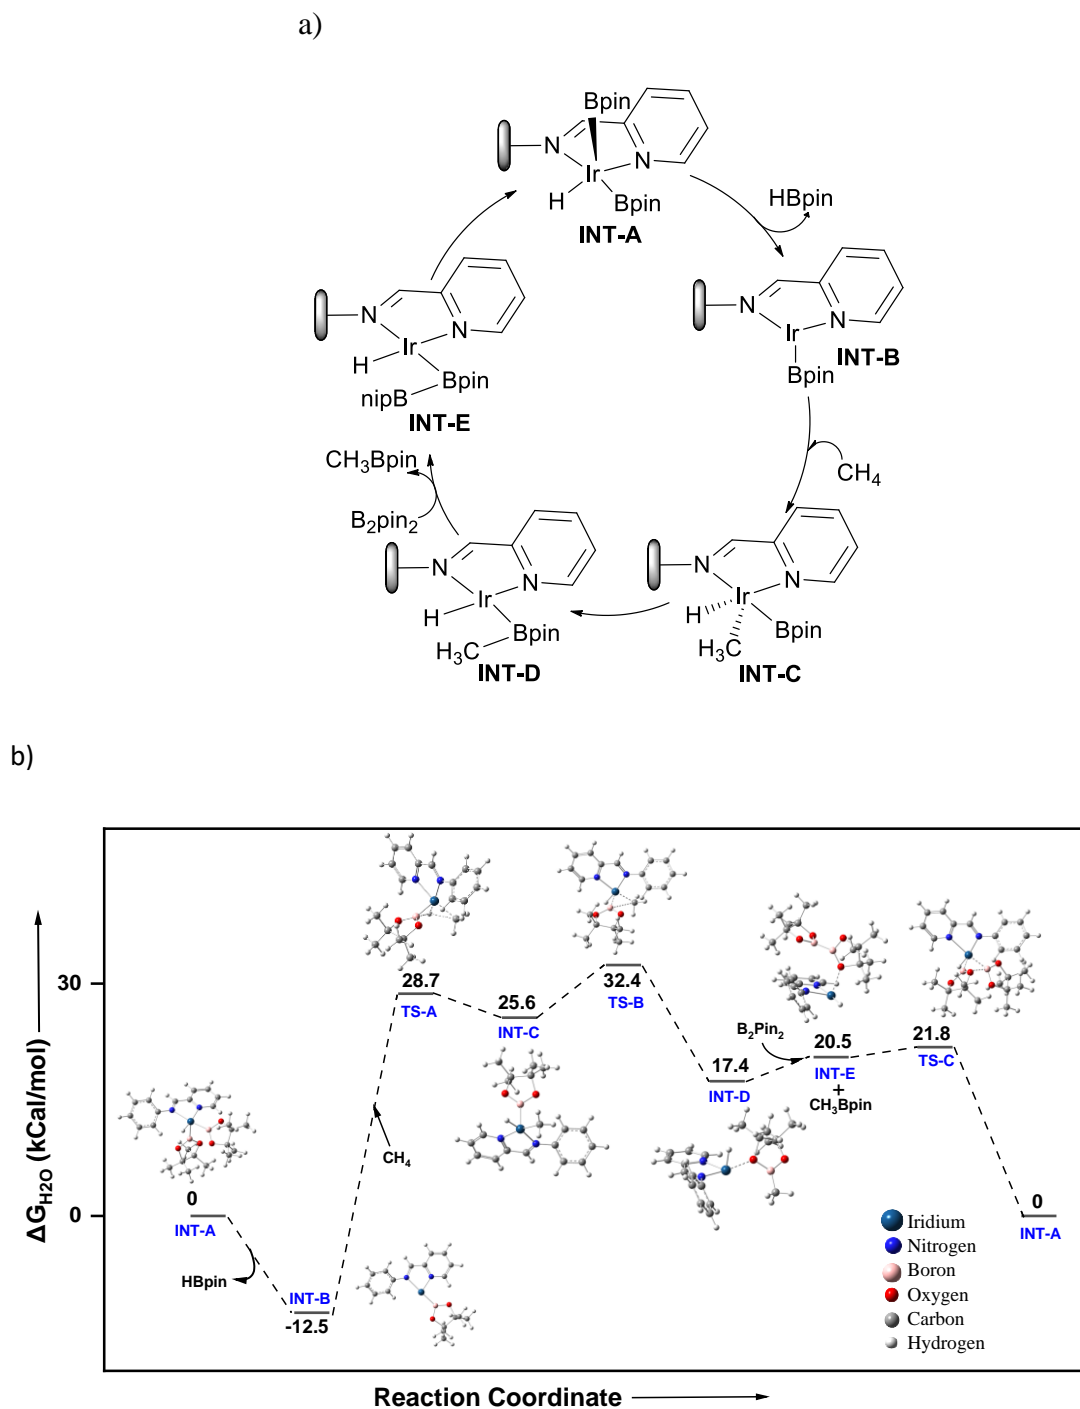

**Figure S17.** (a) Ir<sup>I</sup>-Ir<sup>III</sup>-Ir<sup>I</sup> catalytic cycle of pyrim-UiO-IrH catalyzed monoborylation of methane. (b) DFT-calculated free energy profile at 403 K for Ir<sup>I</sup>-Ir<sup>III</sup>-Ir<sup>I</sup> catalytic cycle of pyrim-UiO-IrH catalyzed methane borylation reaction. We used the Polarizable Continuum Model (PCM) using the integral equation formalism variant (IEFPCM) as the default SCRF method by using cyclohexane as the solvent for all the molecules in this DFT calculation at 403 K.

## 7. XAS analysis.

**7.1. X-ray absorption spectroscopic analysis.** X-ray Near-Edge Structure (XANES) and Extended X-ray Absorption Fine Structure (EXAFS) measurements have been carried out at the Energy-Scanning EXAFS beamLine (BL-9) at the Indus-2 Synchrotron Source at Raja Ramanna Centre for Advanced Technology (RRCAT), Indore, India.<sup>14</sup> All the measurements were performed at room temperature. This beamLine operates in the energy range of 4 keV to 25 keV. The beamLine optics consist of a Rh/Pt coated collimating meridional cylindrical mirror and the collimated beam reflected by the mirror is monochromatized by a Si (111) based double crystal monochromator (DCM). The second crystal of the DCM is a sagittal cylindrical crystal which is used for horizontal focusing of the beam while another Rh/Pt coated bendable post mirror facing downward is used for vertical focusing of the beam at the sample position. Two ionization chambers (300 mm length each) have been used for data collection in the transmission mode; one ionization chamber for measuring incident flux, the second one for measuring transmitted flux. For energy calibration, standard metal foils were used. Appropriate gas pressure and gas mixture have been chosen to achieve 10-20% absorption in the first ionization chamber and 70-90% absorption in the second ionization chamber to obtain a better signal-to-noise ratio. Pellets were made from powder samples for recording absorption spectra. Sample powder was mixed homogeneously with cellulose powder in appropriate proportion and pressed (2 Ton) into a 15 mm diameter disc. The amount of the sample was estimated such that to get a reasonable edge jump at a particular absorption edge of the element to be probed. Spectra were collected at the iridium L<sub>3</sub>-edge in transmission mode and were calibrated against the reference spectrum of metallic iridium (11215 eV). Data were processed using Demeter software.<sup>15</sup> Metallic iridium pellet standard was used as a reference for energy calibration and was measured simultaneously with experimental samples.

**7.2. XANES analysis.** The oxidation states of the Ir species within pyrim-UiO-IrCl<sub>3</sub>(THF) and pyrim-UiO-IrH were determined by the comparison of the energy of its L<sub>3</sub>-edge positions to that of Ir(0) and IrO<sub>2</sub>. The positions of the L<sub>3</sub>-edge of pyrim-UiO-IrCl<sub>3</sub>(THF) (11219.5 eV) was ~1.5 eV lower than IrO<sub>2</sub> (11221.0 eV), while L<sub>3</sub>-edge of pyrim-UiO-IrH (11216.5 eV) was ~1.5 eV higher in energy to Ir(0) (11215 eV). We, therefore, conclude that Ir ion in pyrim-UiO-IrCl<sub>3</sub>(THF) has +3 oxidation state and in pyrim-UiO-IrH has +1 oxidation state.

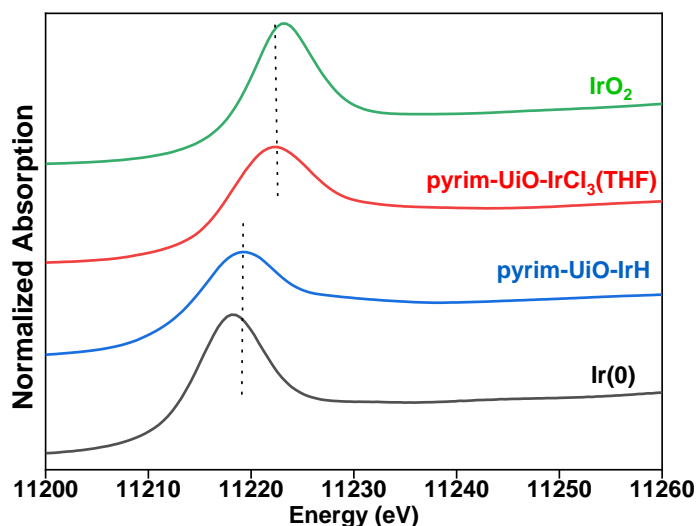

**Figure S18.** Ir  $L_3$ -edge XANES spectra of Ir(0) (black), pyrim-UiO-IrH (blue), pyrim-UiO-IrCl<sub>3</sub>(THF) (red) and IrO<sub>2</sub>(green).

**7.3. EXAFS fitting using DFT optimized structures.** The spectra were calibrated against the reference spectra and aligned to the first peak in the smoothed first derivative of the absorption spectrum, the background noise was removed, and the spectra were processed to obtain a normalized unit edge step. The fitting parameters of pyrim-UiO-IrCl<sub>3</sub> and pyrim-UiO-IrH are summarized in Table S4, and Table S5, respectively.

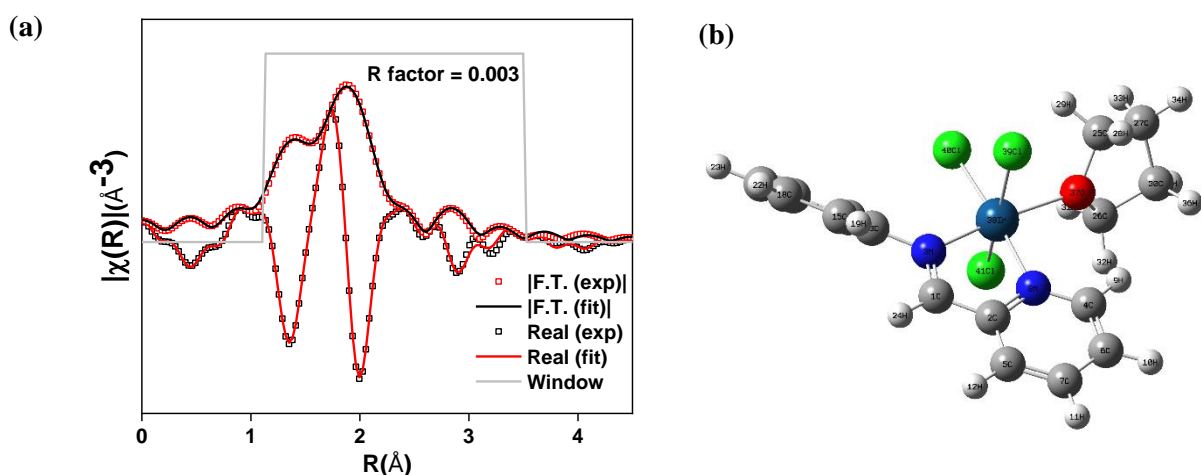

**Figure S19.** (a) EXAFS spectra (red and black hollow squares) and fits (red and black solid lines) of pyrim-UiO-IrCl<sub>3</sub> in the R space from 1.15 - 3.5 Å. (b) DFT optimized structure of (pyrim)IrCl<sub>3</sub>(THF) molecule.

**Table S4.** Summary of the EXAFS fitting parameters of pyrim-UiO-IrCl<sub>3</sub>.

| Sample             | Pyrim-IrCl <sub>3</sub> (THF) | Fitting range                              | $k$ 3-11 Å <sup>-1</sup><br>R 1.15-3.5 Å |
|--------------------|-------------------------------|--------------------------------------------|------------------------------------------|
| Independent points | 11                            | R-factor                                   | 0.003                                    |
| Variables          | 10                            | S <sub>o</sub> <sup>2</sup>                | 0.55                                     |
| Reduced chi-square | 621                           | ΔE <sub>0</sub> (eV)                       | 6.18                                     |
| R(Ir-H26) (Å)      | 1.56±0.06                     | σ <sup>2</sup> (Ir-H3) (Å <sup>2</sup> )   | 0.005±0.001                              |
| R(Ir-N3) (Å)       | 1.99±0.07                     | σ <sup>2</sup> (Ir-N3) (Å <sup>2</sup> )   | 0.003±0.004                              |
| R(Ir-N8) (Å)       | 1.99±0.07                     | σ <sup>2</sup> (Ir-N8) (Å <sup>2</sup> )   | 0.003±0.004                              |
| R(Ir-Cl39) (Å)     | 2.37±0.08                     | σ <sup>2</sup> (Ir-Cl39) (Å <sup>2</sup> ) | 0.006±0.006                              |
| R(Ir-Cl40) (Å)     | 2.37±0.08                     | σ <sup>2</sup> (Ir-Cl40) (Å <sup>2</sup> ) | 0.006±0.006                              |
| R(Ir-Cl41) (Å)     | 2.37±0.08                     | σ <sup>2</sup> (Ir-Cl41) (Å <sup>2</sup> ) | 0.006±0.004                              |
| R(Ir-C1) (Å)       | 2.80±0.04                     | σ <sup>2</sup> (Ir-C1) (Å <sup>2</sup> )   | 0.002±0.004                              |
| R(Ir-C2) (Å)       | 2.80±0.04                     | σ <sup>2</sup> (Ir-C2) (Å <sup>2</sup> )   | 0.002±0.001                              |
| R(Ir-C13) (Å)      | 3.02±0.05                     | σ <sup>2</sup> (Ir-C13) (Å <sup>2</sup> )  | 0.002±0.001                              |
| R(Ir-C4) (Å)       | 3.02±0.05                     | σ <sup>2</sup> (Ir-C4) (Å <sup>2</sup> )   | 0.002±0.001                              |

(b)

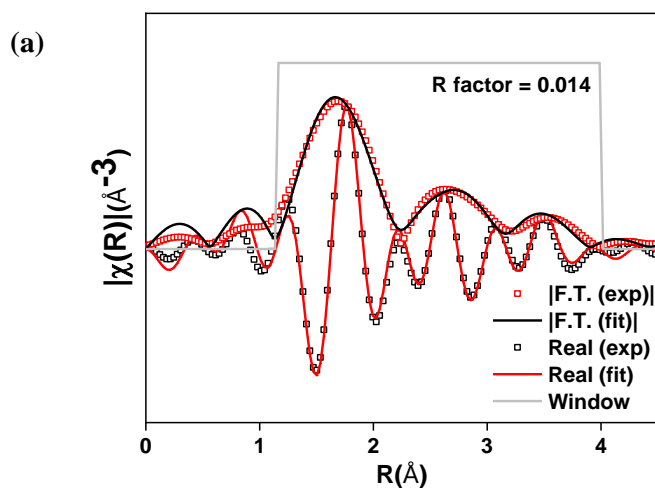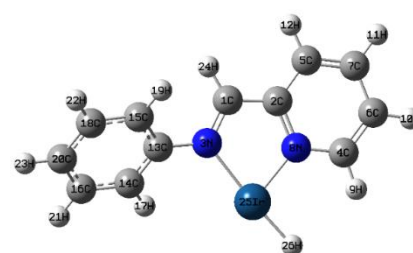

**Figure S20.** (a) EXAFS spectra (red and black hollow squares) and fits (red and black solid lines) of pyrim-UiO-IrH in the R space from 1.15 - 4.0 Å. (b) DFT optimised structure of pyrim-IrH.



**Table S5.** Summary of the EXAFS fitting parameters of pyrim-IrH.

| <b>Sample</b>             | <b>Pyrim-IrH</b> | <b>Fitting range</b>                          | <b><math>k</math> 3-10.5 Å<sup>-1</sup><br/>R 1.15-4.0 Å</b> |
|---------------------------|------------------|-----------------------------------------------|--------------------------------------------------------------|
| <b>Independent points</b> | 13               | <b>R-factor</b>                               | 0.017                                                        |
| <b>Variables</b>          | 11               | <b>S<sub>0</sub><sup>2</sup></b>              | 0.81                                                         |
| <b>Reduced chi-square</b> | 889              | <b>ΔE<sub>0</sub>(eV)</b>                     | 9.65                                                         |
| <b>R(Ir-N3) (Å)</b>       | 1.99±0.06        | <b>σ<sup>2</sup>(Ir-N3) (Å<sup>2</sup>)</b>   | 0.008±0.004                                                  |
| <b>R(Ir-N8) (Å)</b>       | 1.99±0.06        | <b>σ<sup>2</sup> (Ir-N8) (Å<sup>2</sup>)</b>  | 0.008±0.004                                                  |
| <b>R(Ir-C1) (Å)</b>       | 2.70±0.08        | <b>σ<sup>2</sup> (Ir-C1) (Å<sup>2</sup>)</b>  | 0.009±0.006                                                  |
| <b>R(Ir-C2) (Å)</b>       | 2.70±0.08        | <b>σ<sup>2</sup> (Ir-C2) (Å<sup>2</sup>)</b>  | 0.009±0.006                                                  |
| <b>R(Ir-C13) (Å)</b>      | 3.01±0.07        | <b>σ<sup>2</sup> (Ir-C13) (Å<sup>2</sup>)</b> | 0.009±0.004                                                  |
| <b>R(Ir-C4) (Å)</b>       | 3.01±0.07        | <b>σ<sup>2</sup> (Ir-C4) (Å<sup>2</sup>)</b>  | 0.009±0.004                                                  |
| <b>R(Ir-C14) (Å)</b>      | 3.26±0.09        | <b>σ<sup>2</sup> (Ir-C14) (Å<sup>2</sup>)</b> | 0.003±0.001                                                  |
| <b>R(Ir-C15) (Å)</b>      | 4.31±0.05        | <b>σ<sup>2</sup> (Ir-C15) (Å<sup>2</sup>)</b> | 0.005±0.001                                                  |
| <b>R(Ir-C5) (Å)</b>       | 4.31±0.05        | <b>σ<sup>2</sup> (Ir-C5) (Å<sup>2</sup>)</b>  | 0.005±0.001                                                  |
| <b>R(Ir-C4) (Å)</b>       | 4.32±0.05        | <b>σ<sup>2</sup> (Ir-C4) (Å<sup>2</sup>)</b>  | 0.005±0.001                                                  |

**8. XPS analysis.** All the binding energies were corrected with reference to the C1s peak at 284.8 eV. MULTIPAK software was used for peak analysis and de-convolution studies.

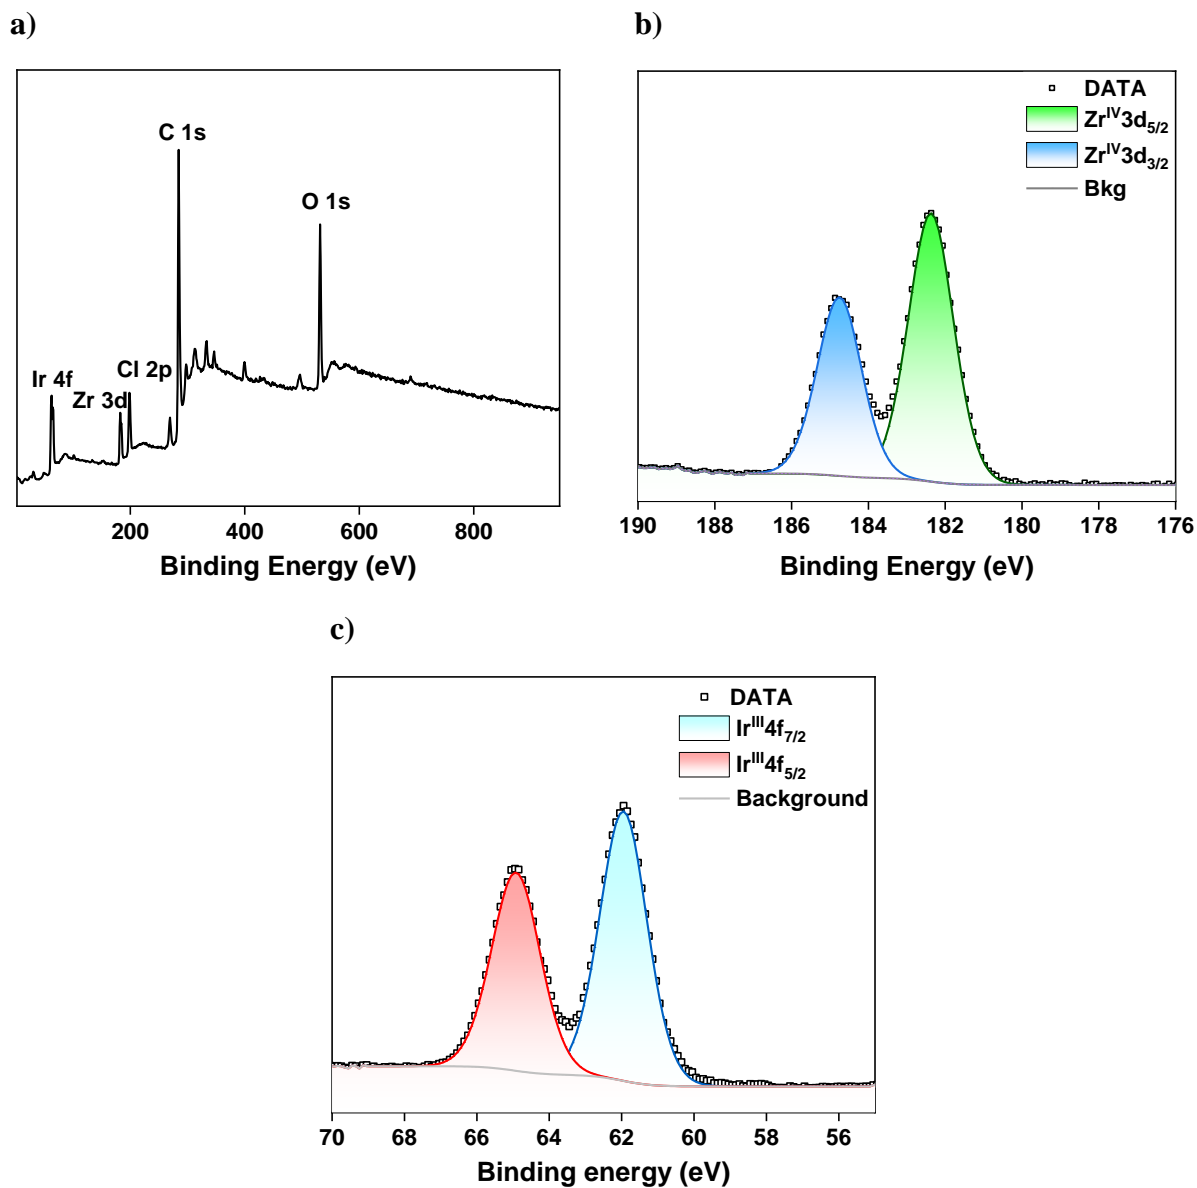

**Figure S21.** a) Raw XPS data of pyrim-UiO-IrCl<sub>3</sub>; b) Zr 3d XPS spectrum of pyrim-UiO-IrCl<sub>3</sub>; c) Ir 4f XPS spectrum of pyrim-UiO-IrCl<sub>3</sub>.

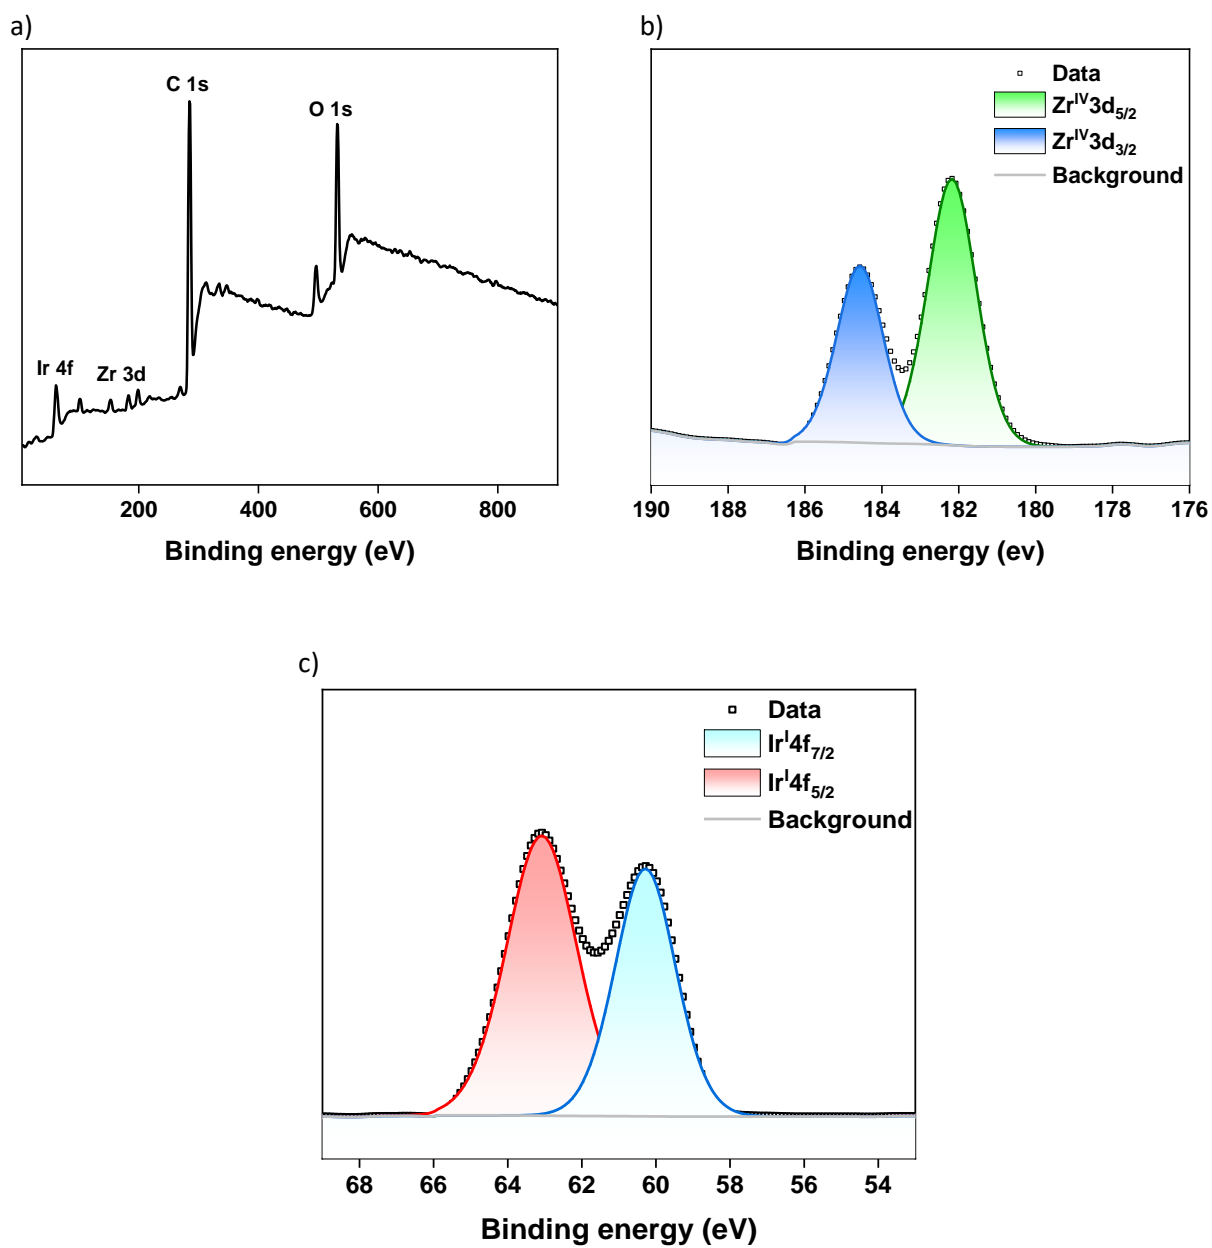

**Figure S22.** a) Raw XPS data of pyrim-UiO-IrH; b) Zr 3d XPS spectrum of pyrim-UiO-IrH; c) Ir 4f XPS spectrum of pyrim-UiO-IrH.

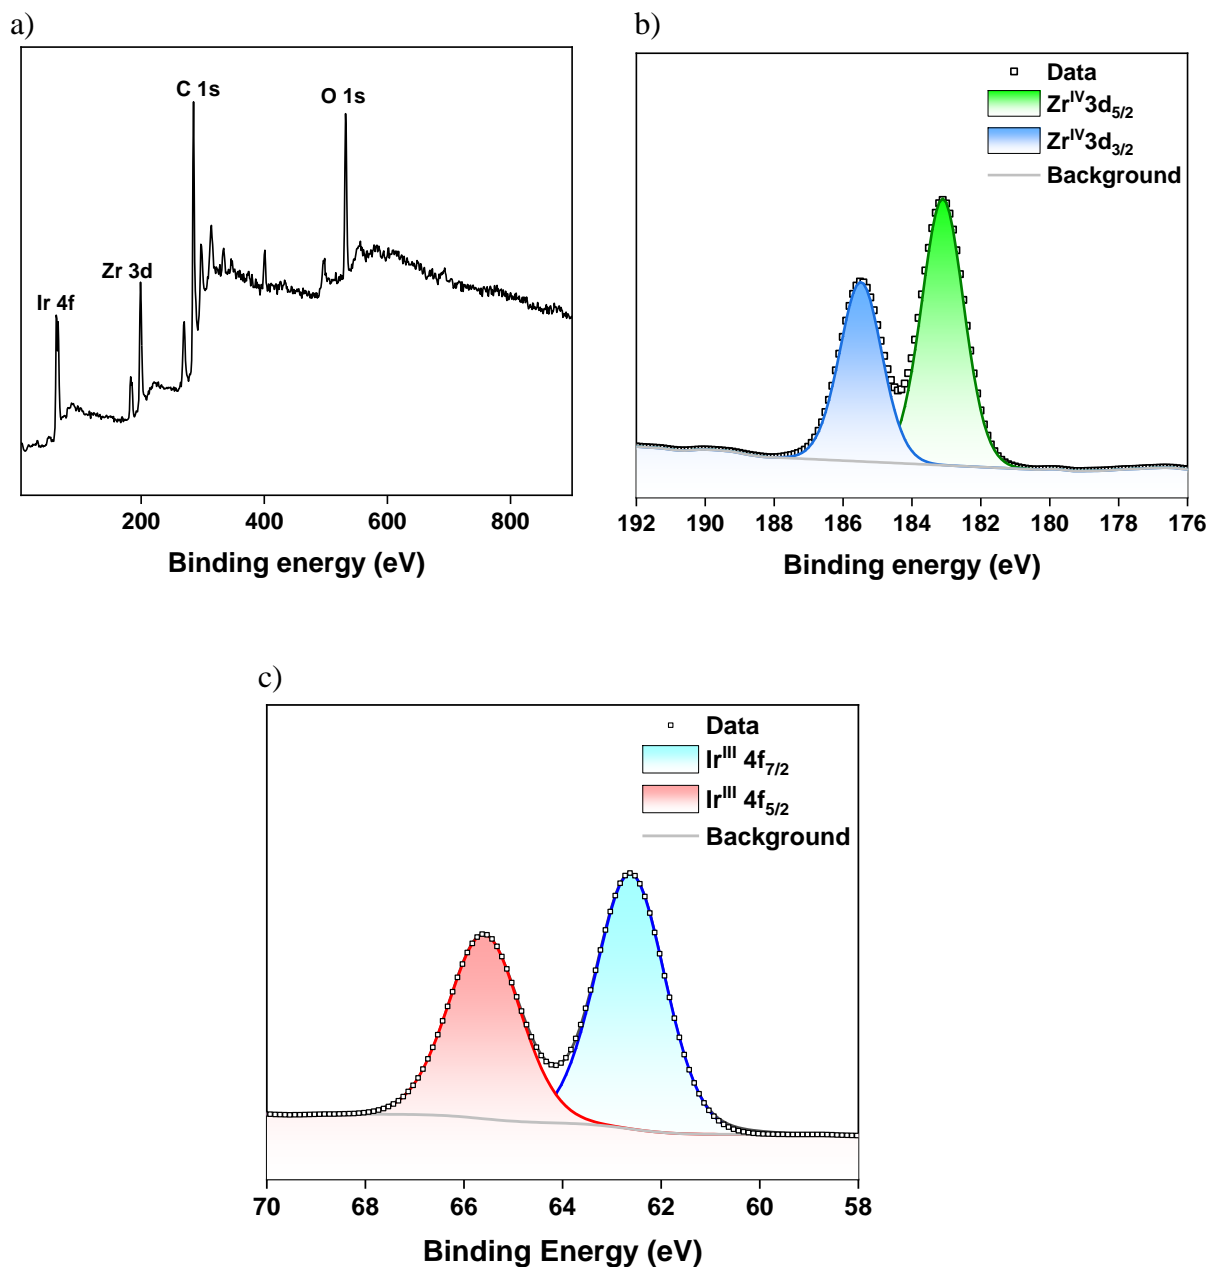

**Figure S23.** a) Raw XPS data of pyrim-UiO-IrH(Bpin)<sub>2</sub>; b) Zr 3d XPS spectrum of pyrim-UiO-IrH(Bpin)<sub>2</sub>; c) Ir 4f XPS spectrum of pyrim-UiO-IrH(Bpin)<sub>2</sub>.

**Table S6. Comparison of catalytic activity of pyrim-UiO-IrH with that of other reported catalysts in borylation of CH<sub>4</sub>.**

| Catalysts                                                       | CH <sub>4</sub> pressure | Temperature/ Reaction time | Yield (TON) of CH <sub>3</sub> Bpin | Reference                                                     |
|-----------------------------------------------------------------|--------------------------|----------------------------|-------------------------------------|---------------------------------------------------------------|
| [Ir(COD)Cl] <sub>2</sub> + 2 equiv. dmpe                        | 34.47 bar                | 150 °C (16 h)              | 52 % (104)                          | <i>Science</i> <b>2016</b> , 351 (6280), 1424-1427.           |
| (MesH)Ir(Bpin) <sub>3</sub> + 3,4,7,8-tetramethylphenanthroline | 35 bar                   | 150 °C (14 h)              | 45 % (15)                           | <i>Science</i> <b>2016</b> , 351 (6280), 1421-1424.           |
| (dmpe)Ir(COD)Cl                                                 | 500 psi                  | 150 °C (16 h)              | 31% (153)                           | <i>ACS Catal.</i> <b>2018</b> , 8 (11), 10021-10031.          |
| UiO-67-Mix-Ir (0.49)                                            | 34 bar                   | 150 °C (14 h)              | 19.5% (67)                          | <i>Nat. Catal.</i> <b>2018</b> , 1 (5), 356-362.              |
| Zr-P1-Ir (0.3)                                                  | 50 bar                   | 110 °C (15 h)              | 38.0% (127)                         | <i>J. Am. Chem. Soc.</i> <b>2019</b> , 141, 11196–11203.      |
| CAL-3-Ir                                                        | 34 bar                   | 150 °C (9 h)               | 29% (126)                           | <i>Angew. Chem. Int. Ed.</i> <b>2019</b> , 58, 10671 – 10676. |
| [(dmpe)Ir(cod)]-SiO <sub>2</sub> (0.069)                        | 34.47 bar                | 150 °C (16 h)              | 82.8% (1204)                        | <i>J. Am. Chem. Soc.</i> <b>2023</b> , 145, 7992–8000.        |
| <b>Pyrim-UiO-IrH (0.5)</b>                                      | <b>40 bar</b>            | <b>130 °C (24 h)</b>       | <b>98% (196)</b>                    | <b>This work</b>                                              |

## 9. References.

- 1 J. H. Cavka, S. Jakobsen, U. Olsbye, N. Guillou, C. Lamberti, S. Bordiga and K. P. Lillerud, *J. Am. Chem. Soc.*, 2008, **130**, 13850–13851.
- 2 K. Manna, T. Zhang, M. Carboni, C. W. Abney and W. Lin, *J. Am. Chem. Soc.*, 2014, **136**, 13182–13185.
- 3 T. Zhang, K. Manna and W. Lin, *J. Am. Chem. Soc.*, 2016, **138**, 3241–3249.
- 4 R. Newar, W. Begum, N. Antil, S. Shukla, A. Kumar, N. Akhtar, Balendra and K. Manna, *Inorg. Chem.*, 2020, **59**, 10473–10481.
- 5 R. Newar, N. Akhtar, N. Antil, A. Kumar, S. Shukla, W. Begum and K. Manna, *Angew. Chem. Int. Ed.*, 2021, **60**, 10964–10970.
- 6 X. Zhang, Z. Huang, M. Ferrandon, D. Yang, L. Robison, P. Li, T. C. Wang, M. Delferro and O. K. Farha, *Nat. Catal.*, 2018, **1**, 356–362.
- 7 X. Feng, Y. Song, Z. Li, M. Kaufmann, Y. Pi, J. S. Chen, Z. Xu, Z. Li, C. Wang and W. Lin, *J. Am. Chem. Soc.*, 2019, **141**, 11196–11203.
- 8 S. N. Tambat, P. K. Sane, S. Suresh, N. Varadan O., A. B. Pandit and S. M. Sontakke, *Adv. Powder Technol.*, 2018, **29**, 2626–2632.
- 9 H. Park, E. N. Brothers and K. M. Merz, *J. Am. Chem. Soc.*, 2005, **127**, 4232–4241.
- 10 T. Vreven, K. S. Byun, I. Komáromi, S. Dapprich, J. A. Montgomery, K. Morokuma and M. J. Frisch, *J. Chem. Theory Comput.*, 2006, **2**, 815–826.

- 11 M. Araújo, B. Lasorne, A. L. Magalhães, G. A. Worth, M. J. Bearpark and M. A. Robb, *J. Chem. Phys.*, 2009, **131**, 144301.
- 12 V. Yempally, S. J. Kyran, R. K. Raju, W. Y. Fan, E. N. Brothers, D. J. Darensbourg and A. A. Bengali, *Inorg. Chem.*, 2014, **53**, 4081–4088.
- 13 S. Canneaux, F. Bohr and E. Henon, *J. Comput. Chem.*, 2014, **35**, 82–93.
- 14 A. K. Poswal, A. Agrawal, A. K. Yadav, C. Nayak, S. Basu, S. R. Kane, C. K. Garg, D. Bhattachryya, S. N. Jha and N. K. Sahoo, Thapar University, Patiala, Punjab, India, 2014, pp. 649–651.
- 15 B. Ravel and M. Newville, *J. Synchrotron Radiat.*, 2005, **12**, 537–541.
